# Supplementary material for: Chemical Constituents of Macaranga occidentalis, Antimicrobial and Chemophenetic Studies
Source: MDPI journal article supplement (doi:10.3390/molecules27248820), 2022-12-12
Supplement: s1 [file s1]

## SUPPLEMENTARY MATERIAL

### Table of contents

Figure S1: ESI-HR Mass spectrum of **6a**

Figure S2: IR spectrum of **6a**

Figure S3:  $^1\text{H}$ -NMR (500 MHz, acetone  $-d_6$ ) spectrum of **6a**

Figure S4:  $^{13}\text{C}$ -NMR (125 MHz, acetone  $-d_6$ ) spectrum of **6a**

Figure S5: DEPT 135 spectrum of **6a**

Figure S6:  $^1\text{H}$ - $^1\text{H}$  COSY spectrum of **6a**

Figure S7: HSQC spectrum of **6a**

Figure S8: HMBC spectrum of **6a**

Figure S9: ESI-HR Mass spectrum of **6b**

Figure S10:  $^1\text{H}$ -NMR (500 MHz, acetone  $-d_6$ ) spectrum of **6b**

Figure S11:  $^{13}\text{C}$ -NMR (125 MHz, acetone  $-d_6$ ) spectrum of **6b**

Figure S12: DEPT 135 spectrum of **6b**

Figure S13:  $^1\text{H}$ - $^1\text{H}$  COSY spectrum of **6b**

Figure S14: HSQC spectrum of **6b**

Figure S15: HMBC spectrum of **6b**

Figure S16: ESI-HR Mass spectrum of **6c**

Figure S17:  $^1\text{H}$ -NMR (500 MHz, acetone  $-d_6$ ) spectrum of **6c**

Figure S18:  $^{13}\text{C}$ -NMR (125 MHz, acetone  $-d_6$ ) spectrum of **6c**

Figure S19: DEPT 135 spectrum of **6c**

Figure S20:  $^1\text{H}$ - $^1\text{H}$  COSY spectrum of **6c**

Figure S21: HSQC spectrum of **6c**

Figure S22: HMBC spectrum of **6c**

Figure S23:  $^1\text{H}$ -NMR (500 MHz,  $\text{CDCl}_3$ ) spectrum of **1+2**

Figure S24:  $^{13}\text{C}$ -NMR (125 MHz,  $\text{CDCl}_3$ ) spectrum of **1+2**

Figure S25:  $^1\text{H}$ -NMR (500 MHz, Pyridine- $d_5$ ) spectrum of **3**

Figure S26:  $^{13}\text{C}$ -NMR (125 MHz, Pyridine- $d_5$ ) spectrum of **3**

Figure S27:  $^1\text{H}$ -NMR (500 MHz,  $\text{CDCl}_3$ ) spectrum of **4**

Figure S28:  $^{13}\text{C}$ -NMR (125 MHz,  $\text{CDCl}_3$ ) spectrum of **4**

Figure S29:  $^1\text{H}$ -NMR (500 MHz, acetone- $d_6$ ) spectrum of **5**

Figure S30:  $^{13}\text{C}$ -NMR (125 MHz, acetone- $d_6$ ) spectrum of **5**

Figure S31:  $^1\text{H}$ -NMR (500 MHz, acetone- $d_6$ ) spectrum of **6**

Figure S32:  $^{13}\text{C}$ -NMR (1254 MHz, acetone- $d_6$ ) spectrum of **6**

Figure S33:  $^1\text{H}$ -NMR (500 MHz, acetone- $d_6$ ) spectrum of **7**

Figure S34:  $^{13}\text{C}$ -NMR (1254 MHz, acetone- $d_6$ ) spectrum of **7**

Figure S35:  $^1\text{H}$ -NMR (500 MHz, acetone- $d_6$ ) spectrum of **8**

Figure S36:  $^{13}\text{C}$ -NMR (1254 MHz, acetone- $d_6$ ) spectrum of **8**

Figure S37:  $^1\text{H}$ -NMR (500 MHz, acetone- $d_6$ ) spectrum of **9**

Figure S38:  $^{13}\text{C}$ -NMR (1254 MHz, acetone- $d_6$ ) spectrum of **9**

Figure S39:  $^1\text{H}$ -NMR (500 MHz, acetone- $d_6$ ) spectrum of **10**

Figure S40:  $^{13}\text{C}$ -NMR (1254 MHz, acetone- $d_6$ ) spectrum of **10**

Figure S41: NOESY spectrum of **10**

Figure S42:  $^1\text{H}$ -NMR (500 MHz, Pyridine- $d_5$ ) spectrum of **11**

Figure S43:  $^{13}\text{C}$ -NMR (125 MHz, Pyridine- $d_5$ ) spectrum of **11**

Figure S44:  $^1\text{H}$ -NMR (500 MHz, DMSO- $d_6$ ) spectrum of **12**

Figure S45:  $^{13}\text{C}$ -NMR (125 MHz, DMSO- $d_6$ ) spectrum of **12**

Figure S46:  $^1\text{H}$ -NMR (500 MHz, Pyridine- $d_5$ ) spectrum of **13**

Figure S47:  $^{13}\text{C}$ -NMR (125 MHz, Pyridine- $d_5$ ) spectrum of **13**

Figure S48:  $^1\text{H}$ -NMR (500 MHz, Pyridine- $d_5$ ) spectrum of **14**

Figure S49:  $^{13}\text{C}$ -NMR (125 MHz, Pyridine- $d_5$ ) spectrum of **14**

Figure S50:  $^1\text{H}$ -NMR (500 MHz,  $\text{CD}_3\text{OD}$ ) spectrum of **15**

Figure S51:  $^{13}\text{C}$ -NMR (125 MHz,  $\text{CD}_3\text{OD}$ ) spectrum of **15**

Figure S52: NOESY spectrum of **15**

Figure S53:  $^1\text{H}$ -NMR (500 MHz, DMSO- $d_6$ ) spectrum of **16**

Figure S54:  $^{13}\text{C}$ -NMR (125 MHz, DMSO- $d_6$ ) spectrum of **16**

Figure S55: NOESY spectrum of **16**

Figure S56:  $^1\text{H}$ -NMR (500 MHz,  $\text{CDCl}_3$ - $\text{CD}_3\text{OD}$ ) spectrum of **17**

Figure S57:  $^{13}\text{C}$ -NMR (125 MHz,  $\text{CDCl}_3$ - $\text{CD}_3\text{OD}$ ) spectrum of **17**

Scheme S1: Protocol of extraction and isolation of compounds from *M. occidentalis*



|                               |                                                                |                   |            |
|-------------------------------|----------------------------------------------------------------|-------------------|------------|
| Measured Ion Mass(es) :       | 565.2560                                                       | Deviation [mmu] : | 0.06 [mmu] |
| Calculated Ion Mass(es) :     | 565.25606                                                      | Deviation [ppm] : | 0.11 [ppm] |
| Potential Molecular Formula : | C <sub>34</sub> H <sub>38</sub> O <sub>6</sub> Na <sup>+</sup> |                   |            |

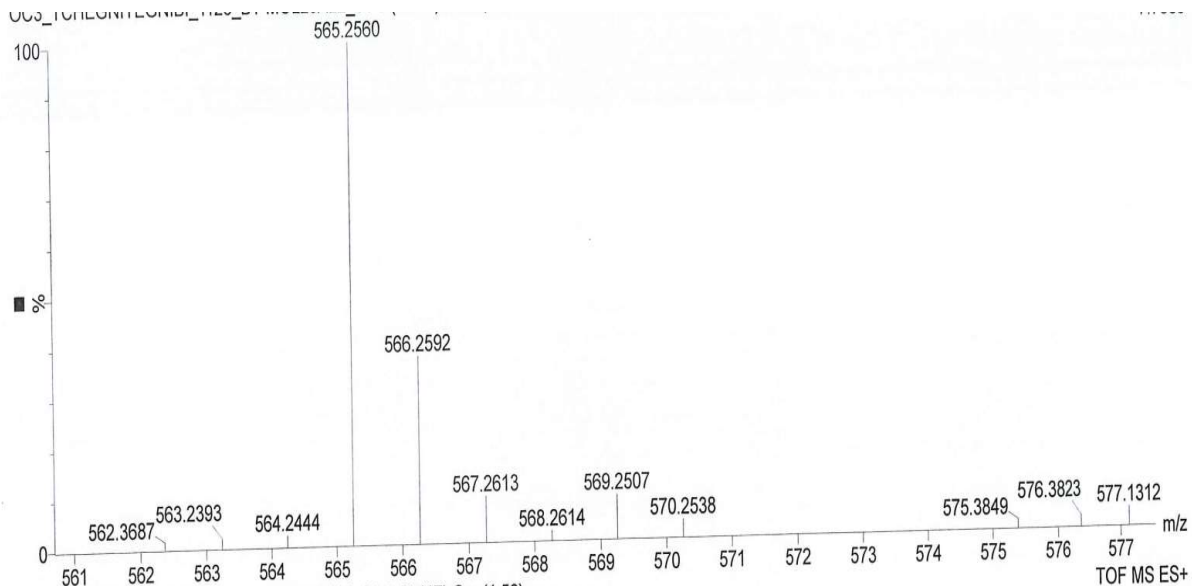

Figure S1: ESI-HR Mass spectrum of **6a**

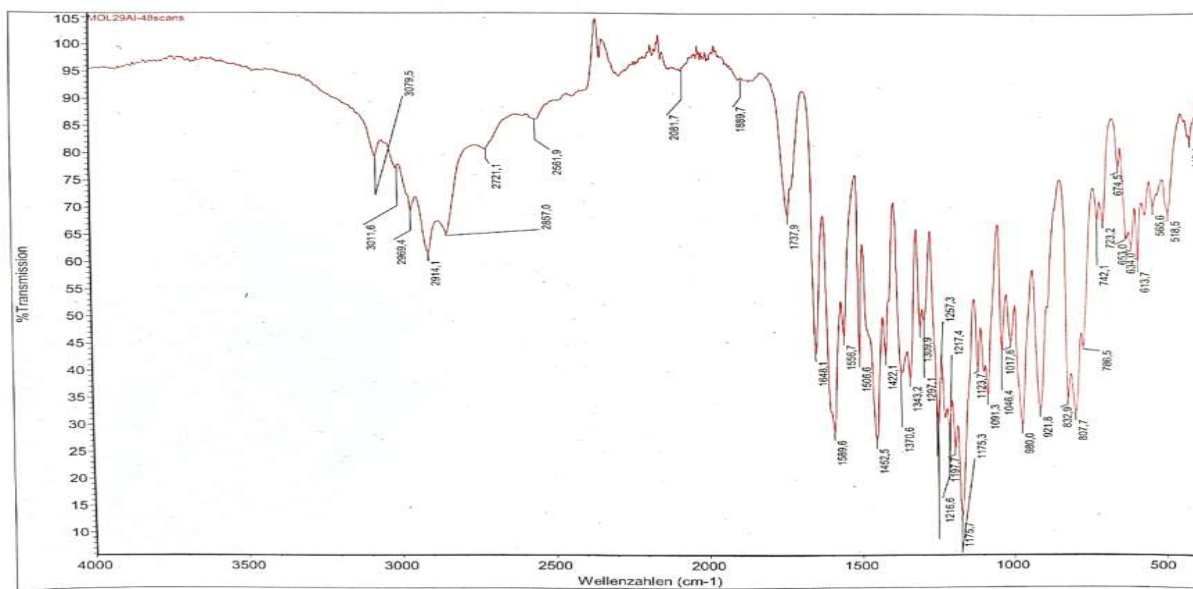

Figure S2: IR spectrum of **6a**

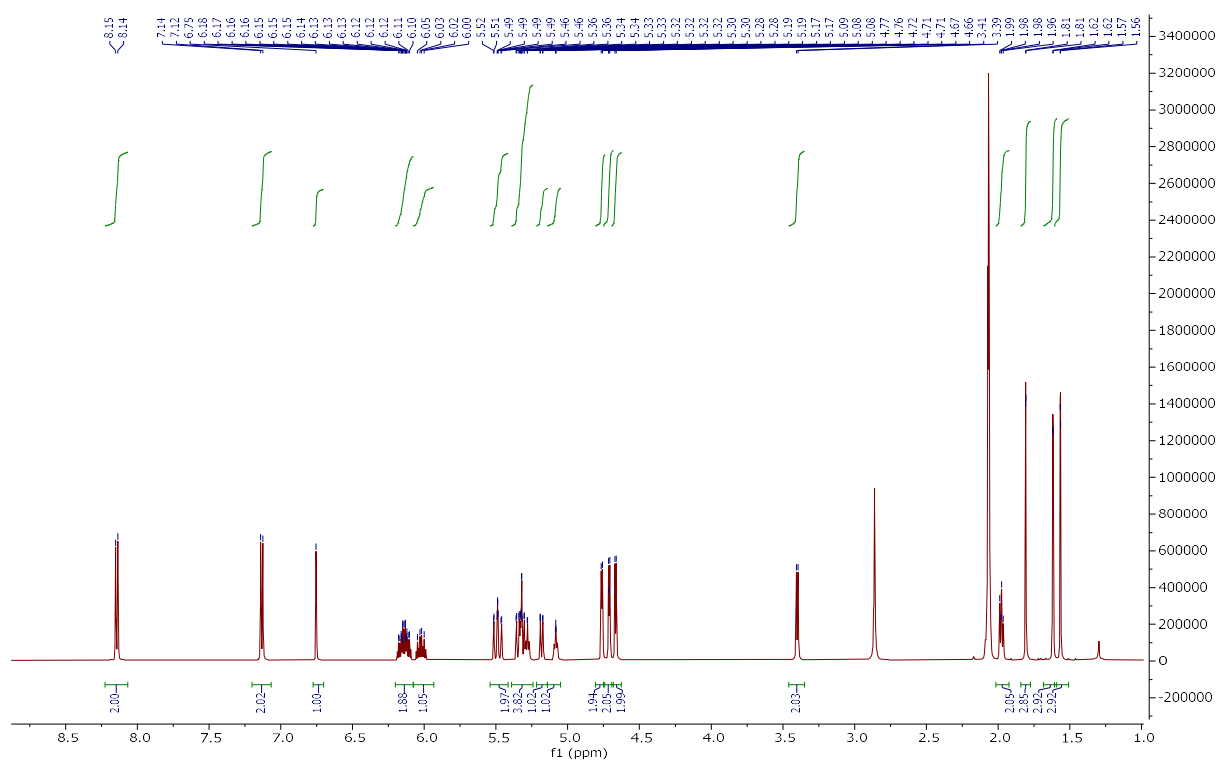

Figure S3:  $^1\text{H}$ -NMR (500 MHz, acetone- $d_6$ ) spectrum of **6a**

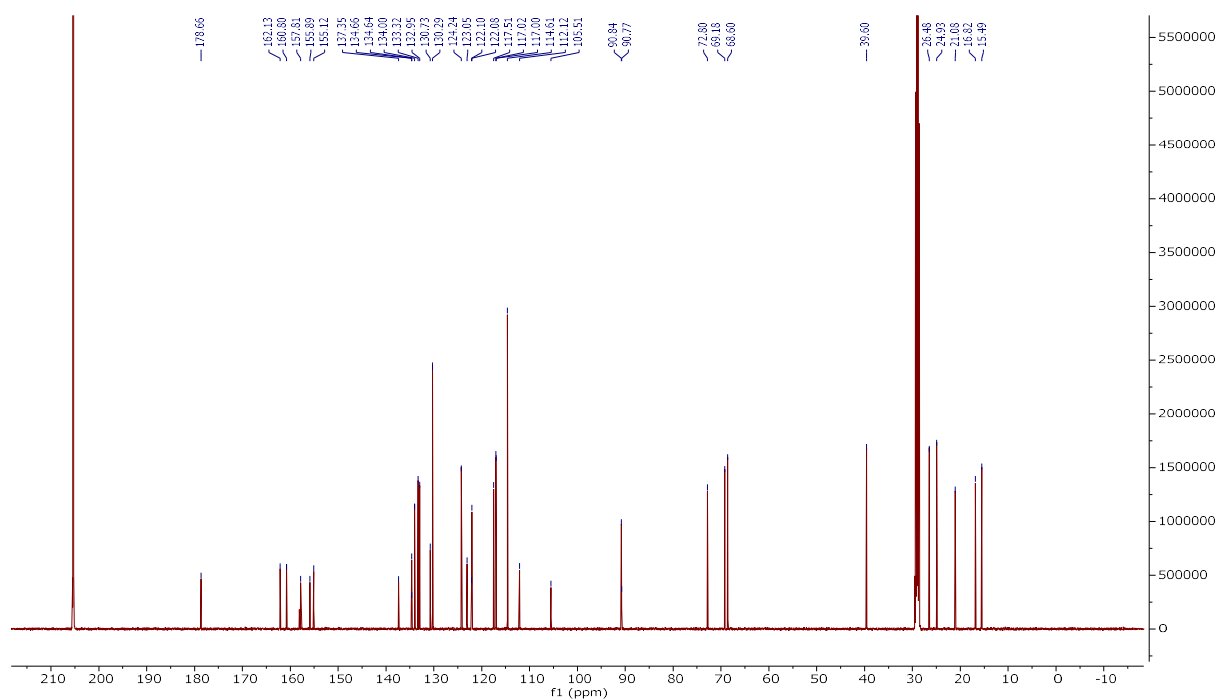

Figure S4:  $^{13}\text{C}$ -NMR (125 MHz, acetone- $d_6$ ) spectrum of **6a**

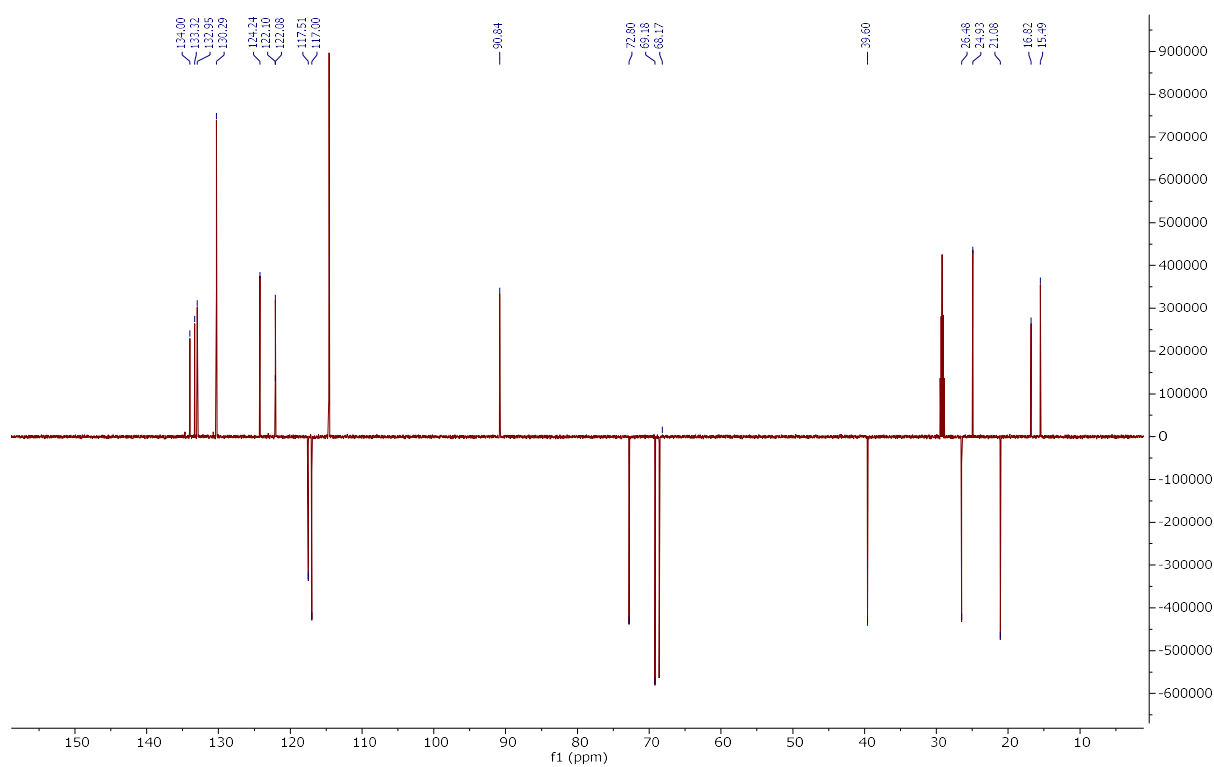

Figure S5: DEPT 135 spectrum of **6a**

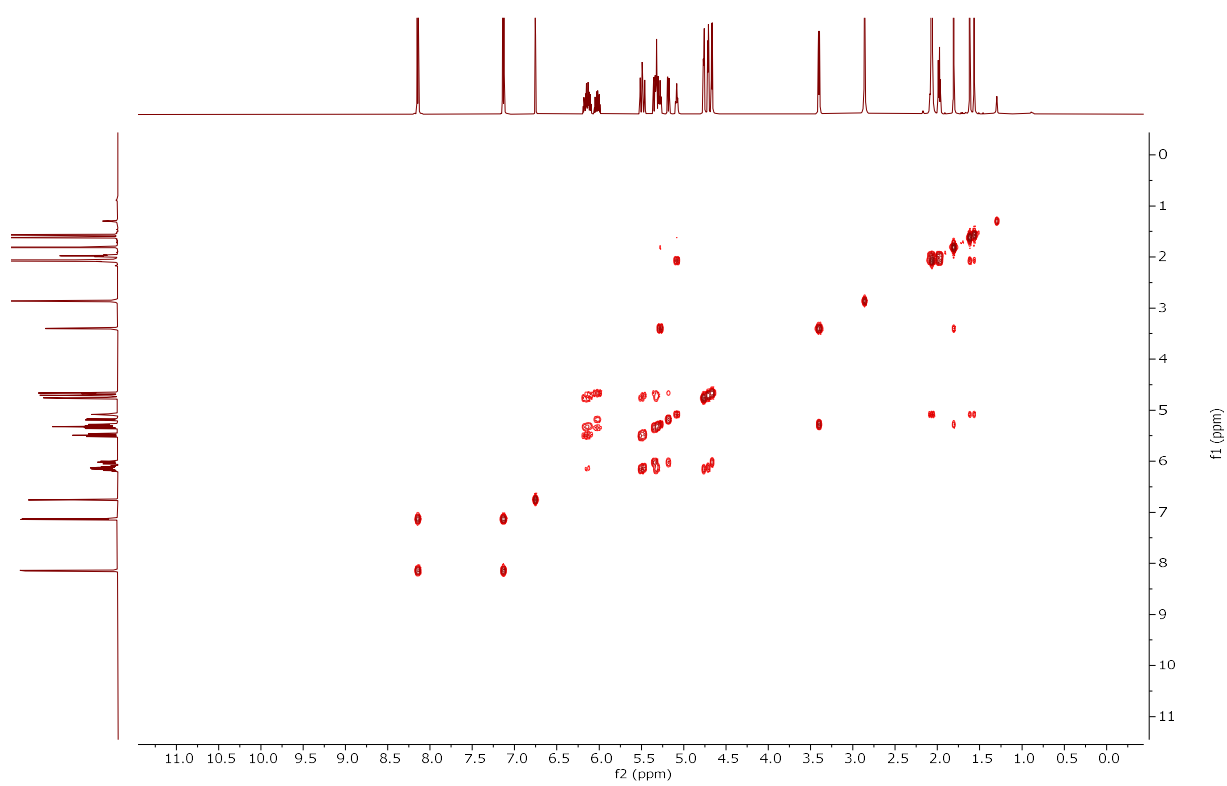

Figure S6:  $^1\text{H}$ - $^1\text{H}$  COSY spectrum of **6a**

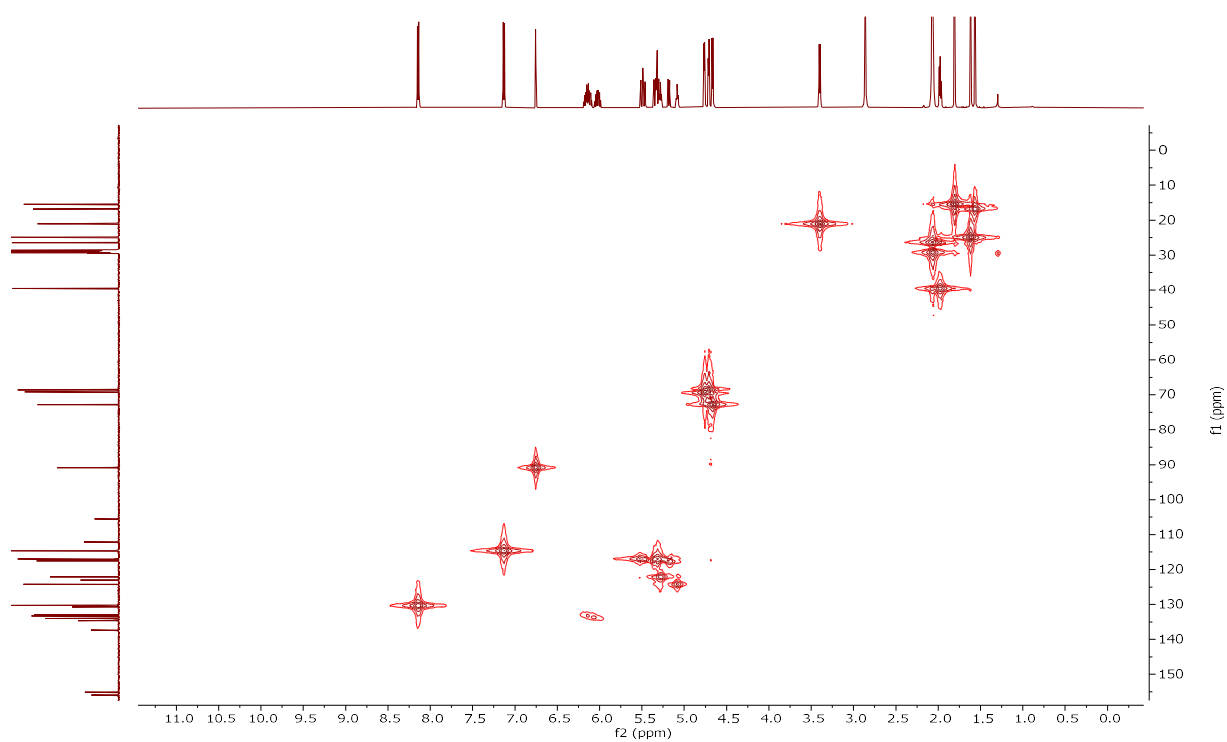

Figure S7: HSQC spectrum of 6a

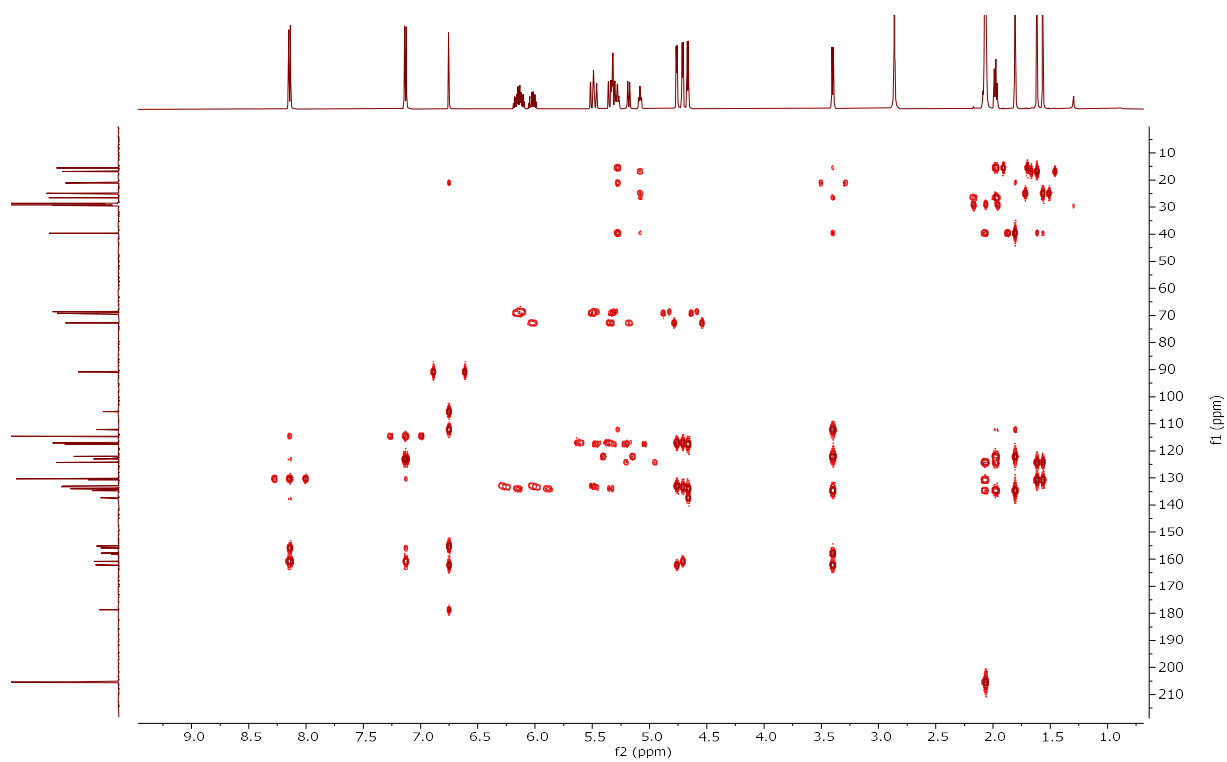

Figure S8: HMBC spectrum of 6a

|                               |                                                               |                   |            |
|-------------------------------|---------------------------------------------------------------|-------------------|------------|
| Measured Ion Mass(es) :       | 583.3052                                                      | Deviation [mmu] : | 0.22 [mmu] |
| Calculated Ion Mass(es) :     | 583.30542                                                     | Deviation [ppm] : | 0.38 [ppm] |
| Potential Molecular Formula : | C <sub>37</sub> H <sub>42</sub> O <sub>6</sub> H <sup>+</sup> |                   |            |

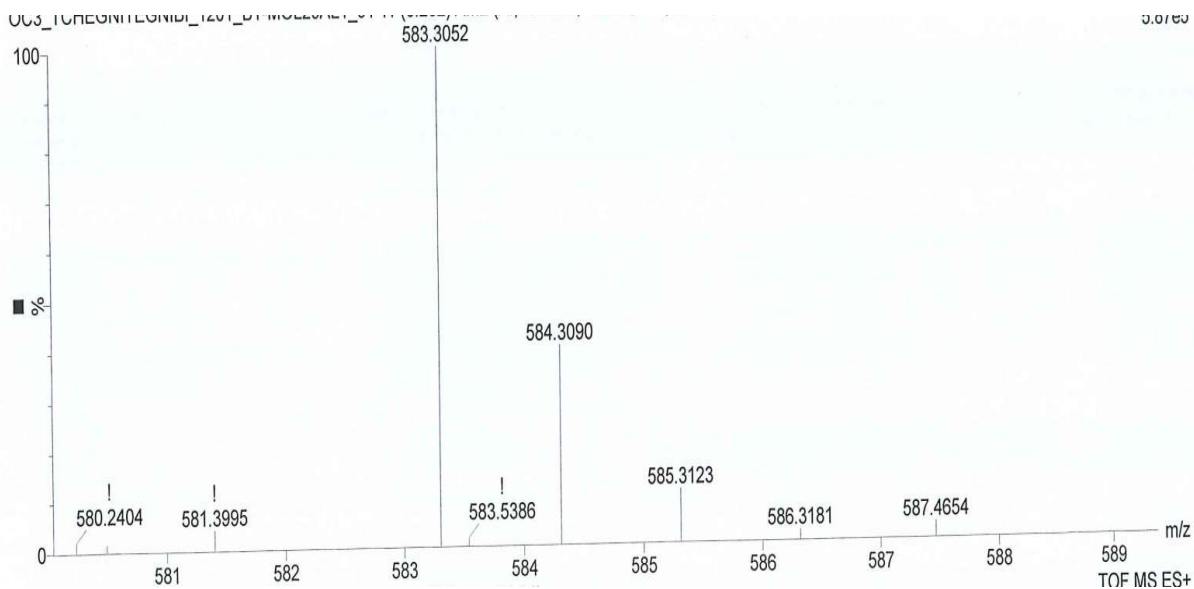

Figure S9: ESI-HR Mass spectrum of **6b**

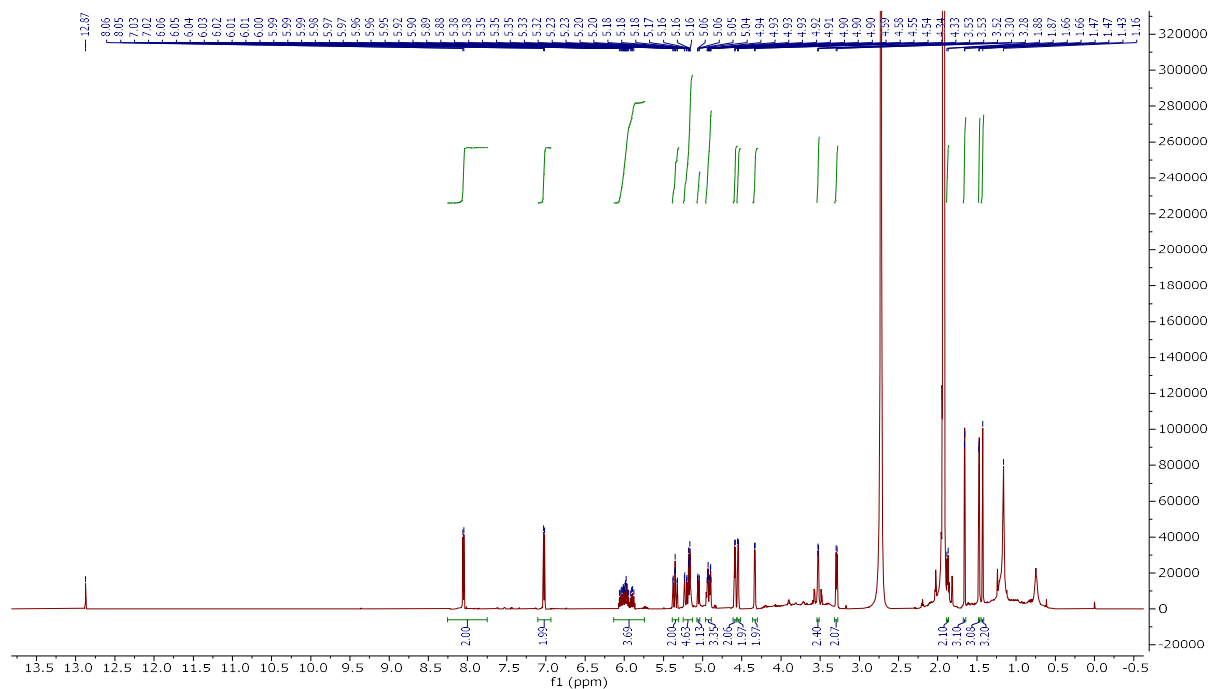

Figure S10: <sup>1</sup>H-NMR (500 MHz, acetone-*d*<sub>6</sub>) spectrum of **6b**



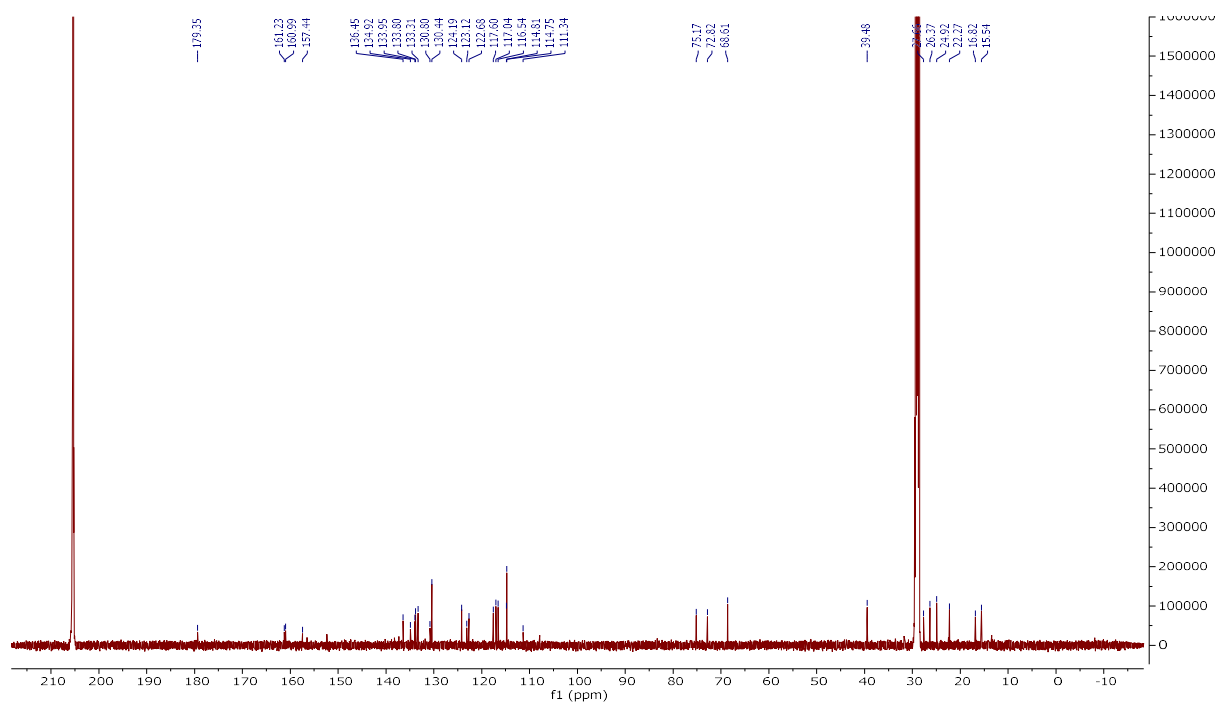

Figure S11: <sup>13</sup>C-NMR (125 MHz, acetone-*d*<sub>6</sub>) spectrum of **6b**

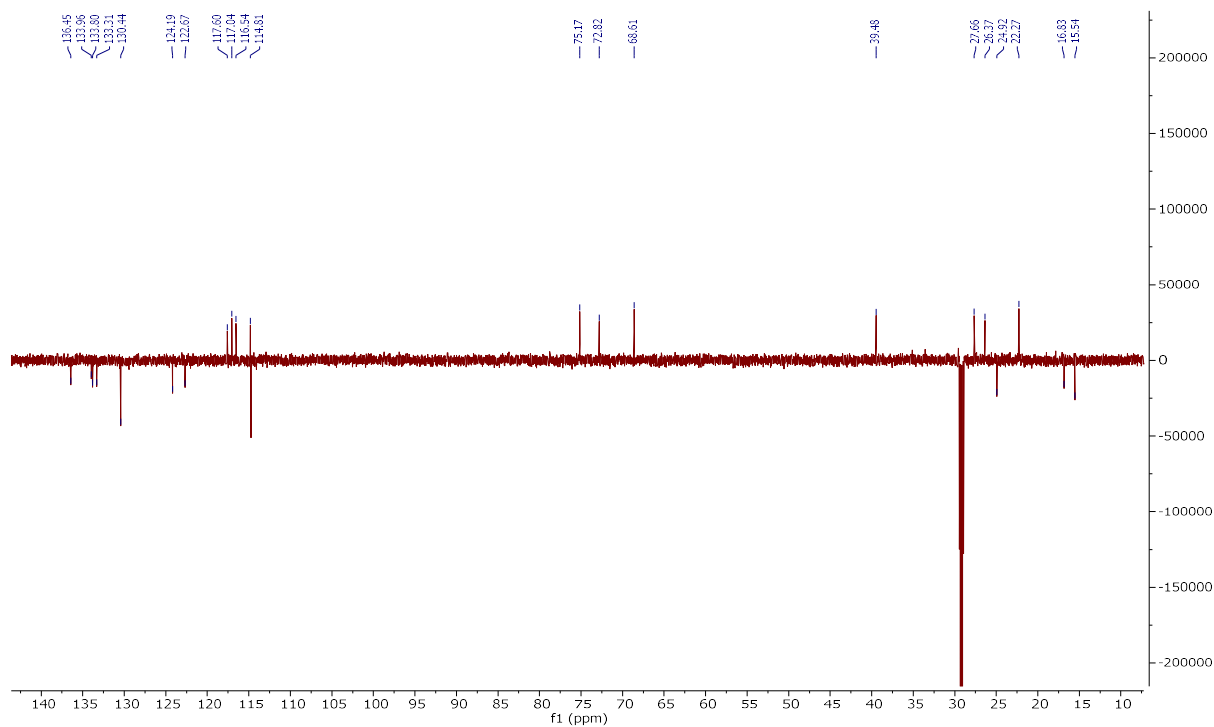

Figure S12: DEPT 135 spectrum of **6b**



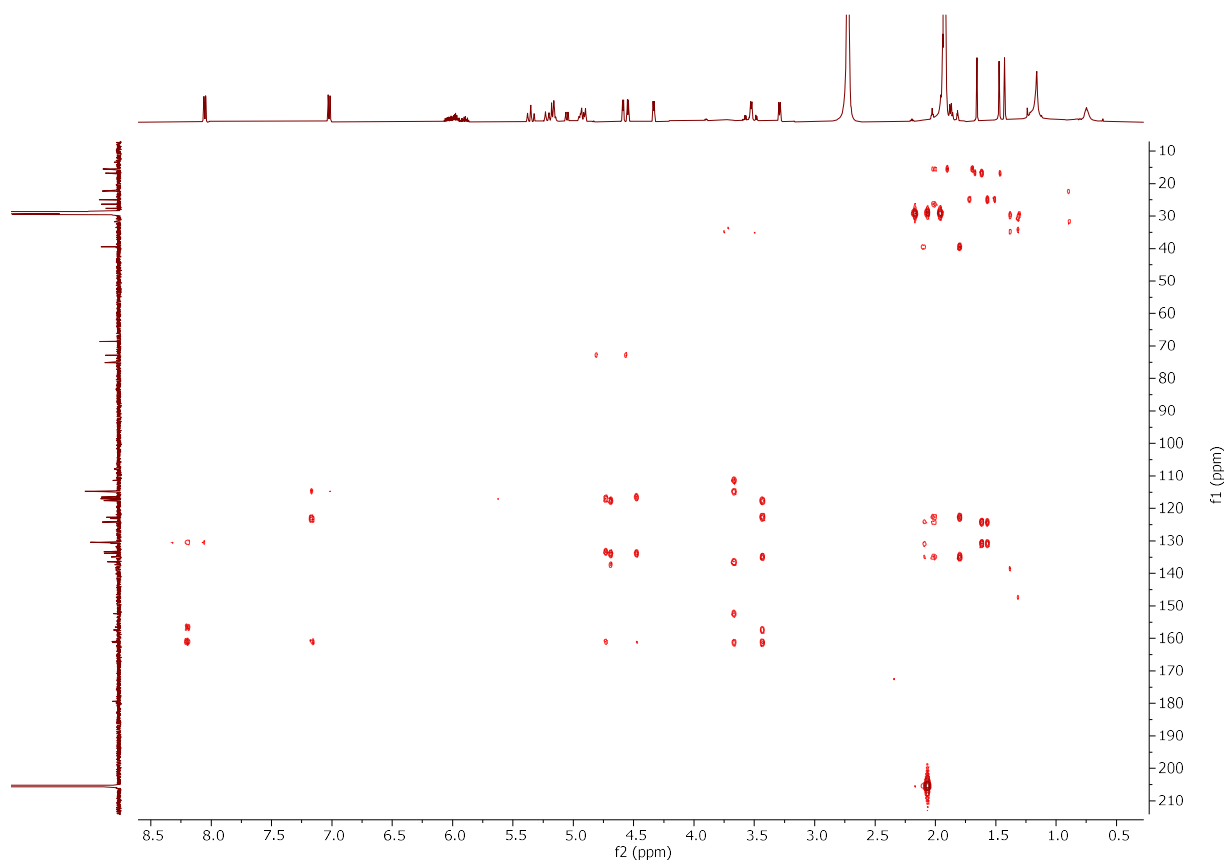

Figure S15: HMBC spectrum of **6b**

|                                      |                          |                          |            |
|--------------------------------------|--------------------------|--------------------------|------------|
| <b>Measured Ion Mass(es) :</b>       | 613.2043                 | <b>Deviation [mmu] :</b> | 0.12 [mmu] |
| <b>Calculated Ion Mass(es) :</b>     | 613.20442                | <b>Deviation [ppm] :</b> | 0.20 [ppm] |
| <b>Potential Molecular Formula :</b> | C33H34O10Na <sup>+</sup> |                          |            |

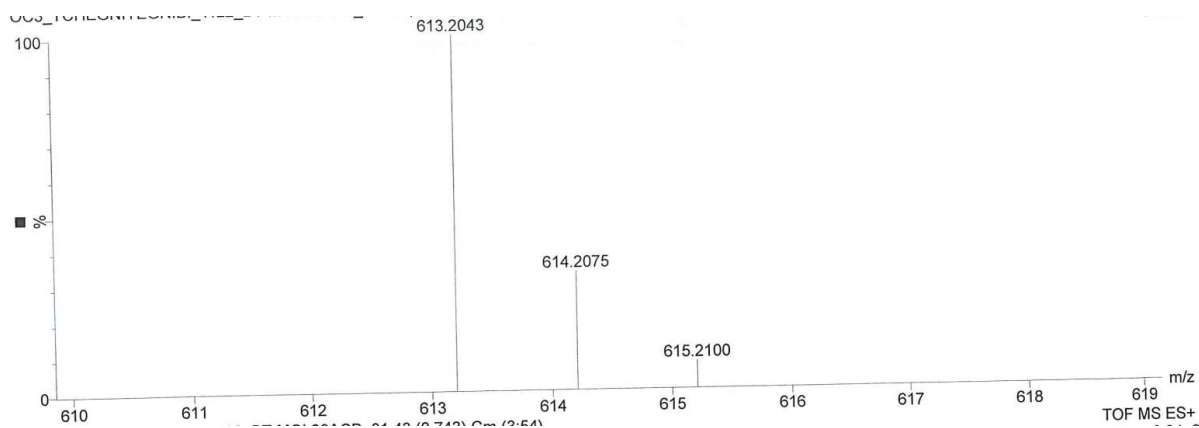

Figure S16: ESI-HR Mass spectrum of **6c**

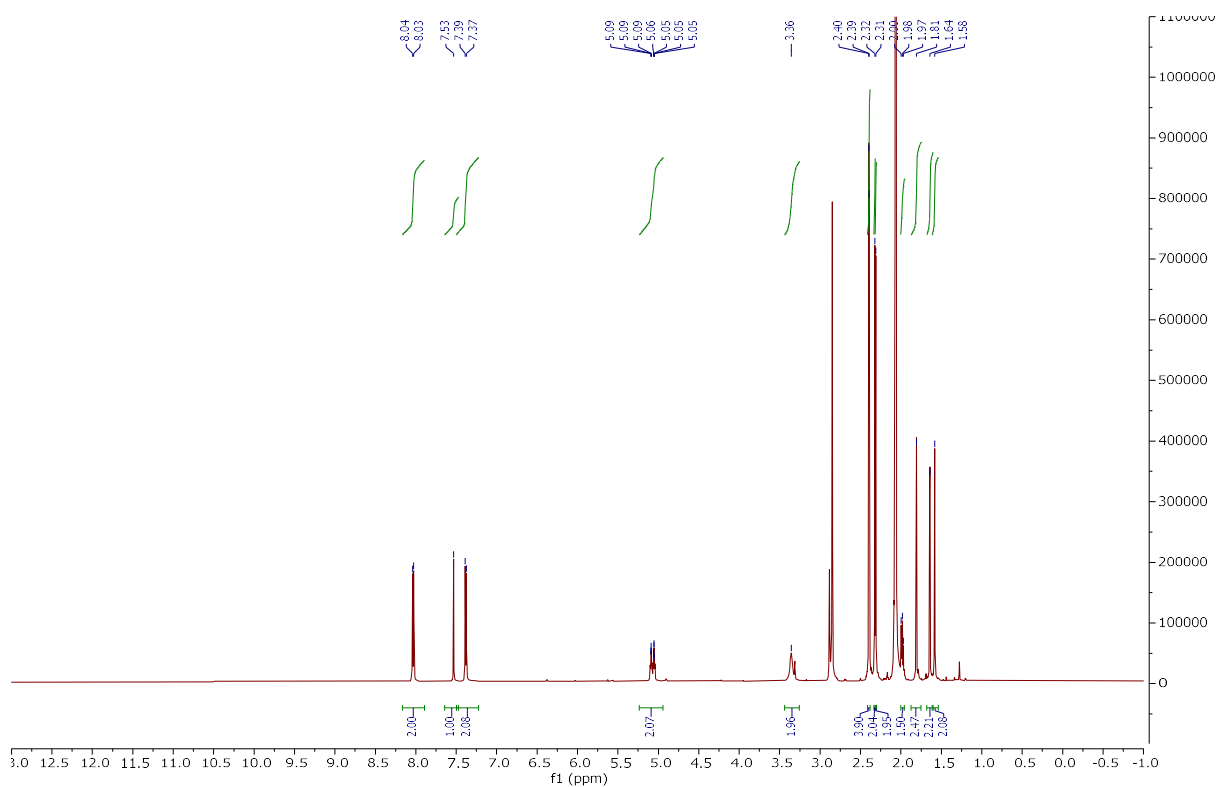

Figure S17: <sup>1</sup>H-NMR (500 MHz, acetone-*d*<sub>6</sub>) spectrum of **6c**

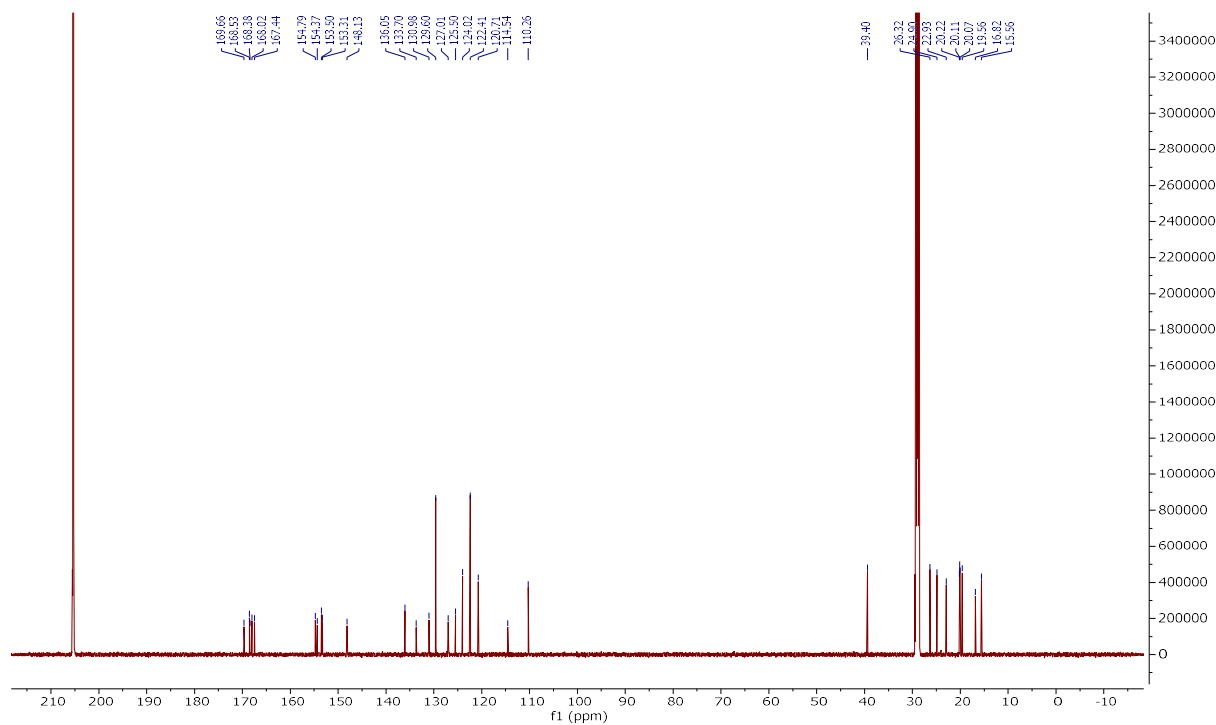

Figure S18: <sup>13</sup>C-NMR (125 MHz, acetone-*d*<sub>6</sub>) spectrum of **6c**

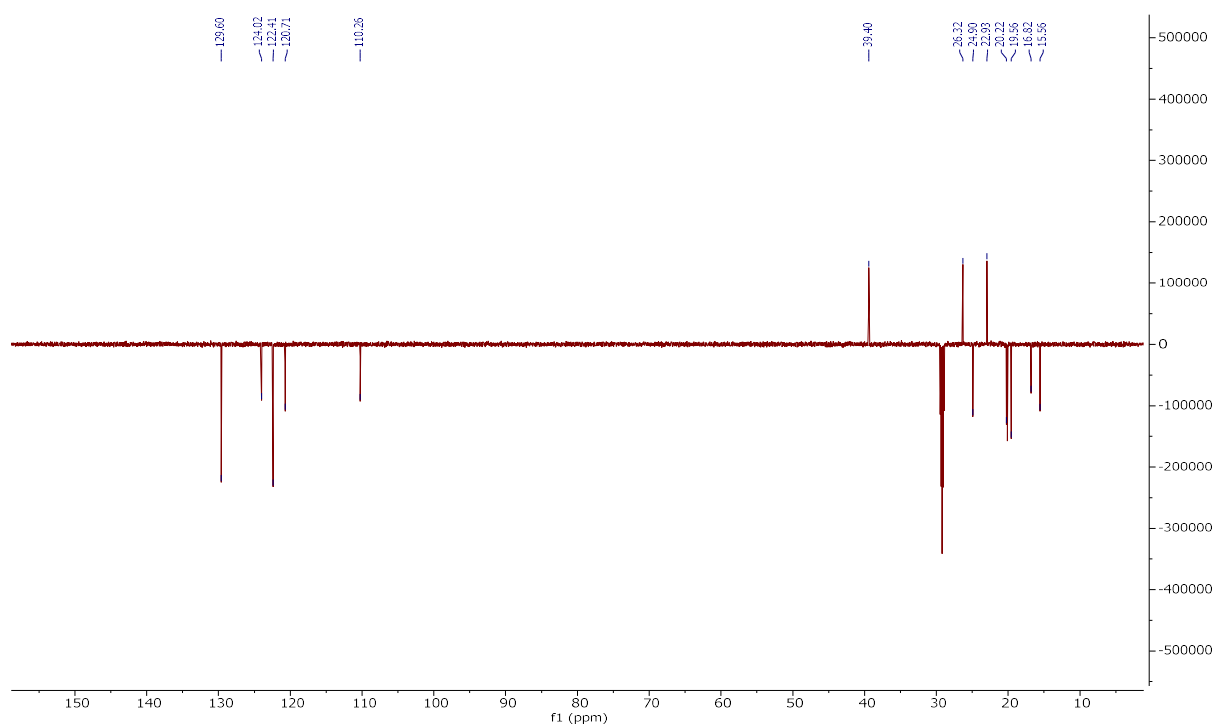

Figure S19: DEPT 135 spectrum of **6c**

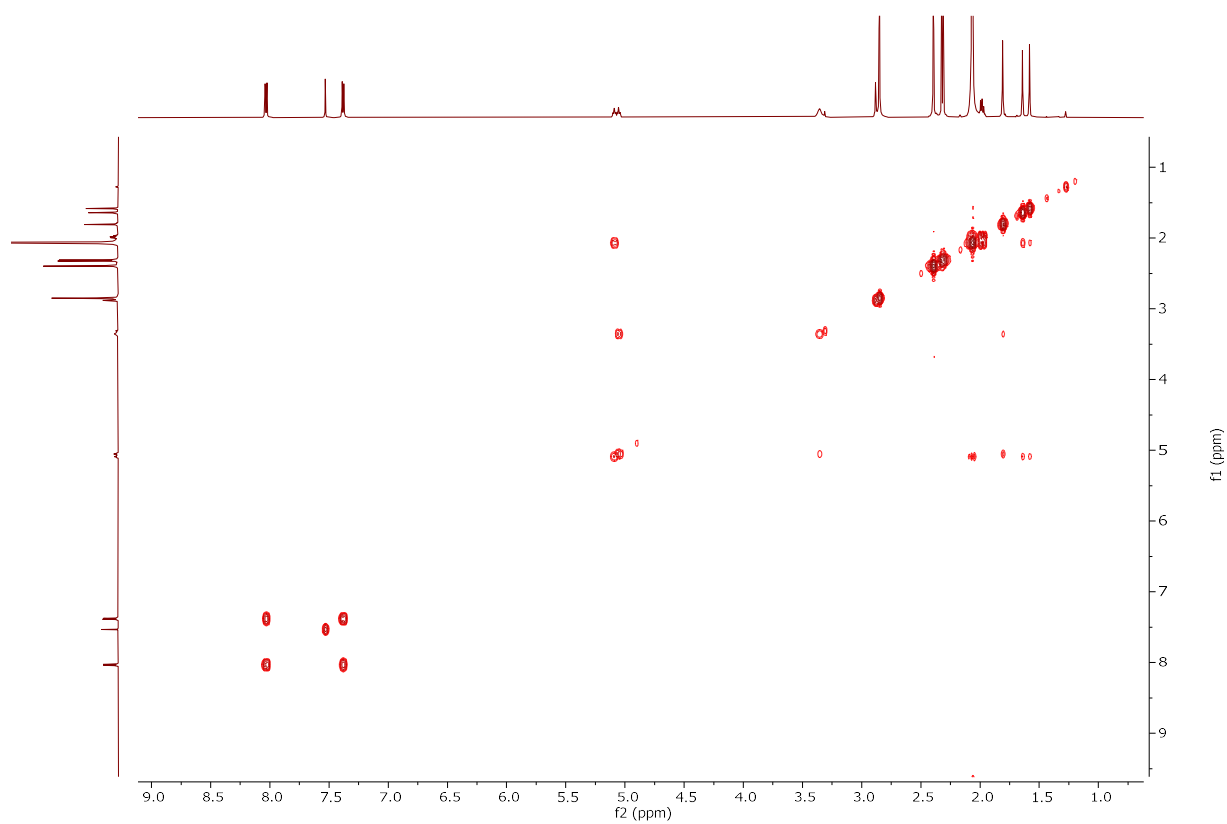

Figure S20:  $^1\text{H}$ - $^1\text{H}$  COSY spectrum of **6c**

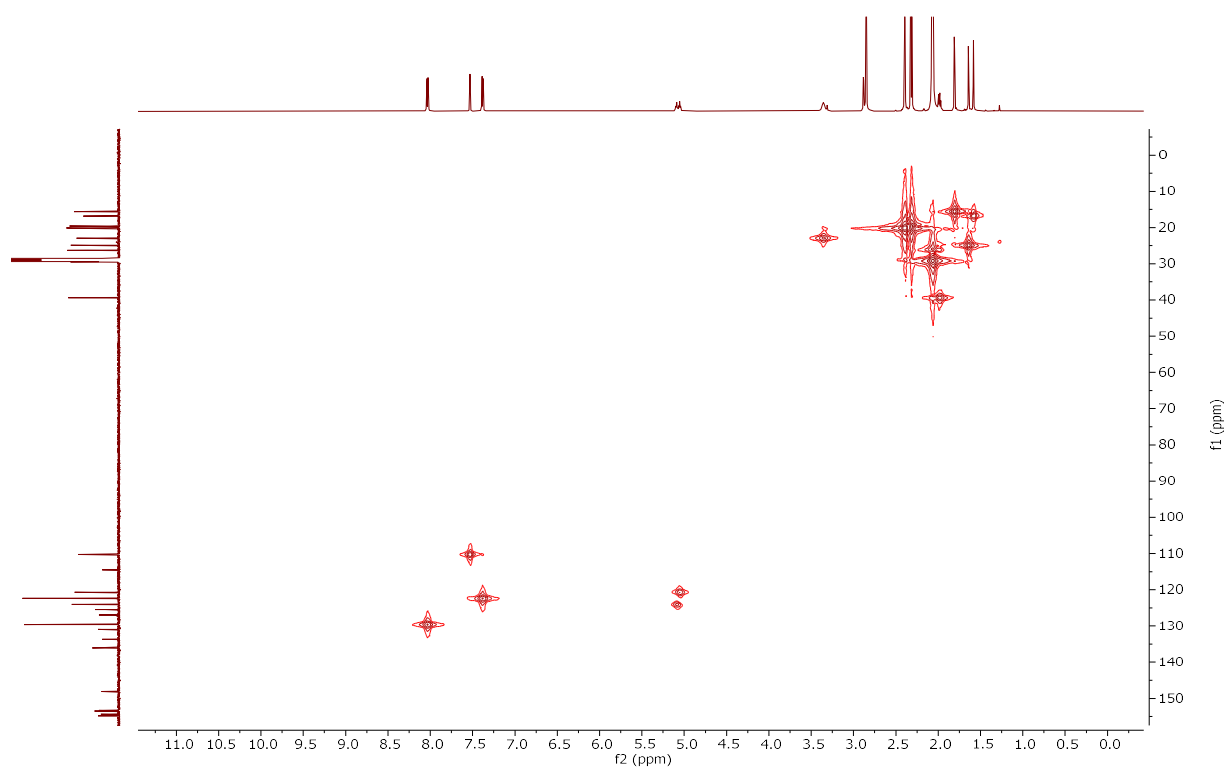

Figure S21: HSQC spectrum of **6c**

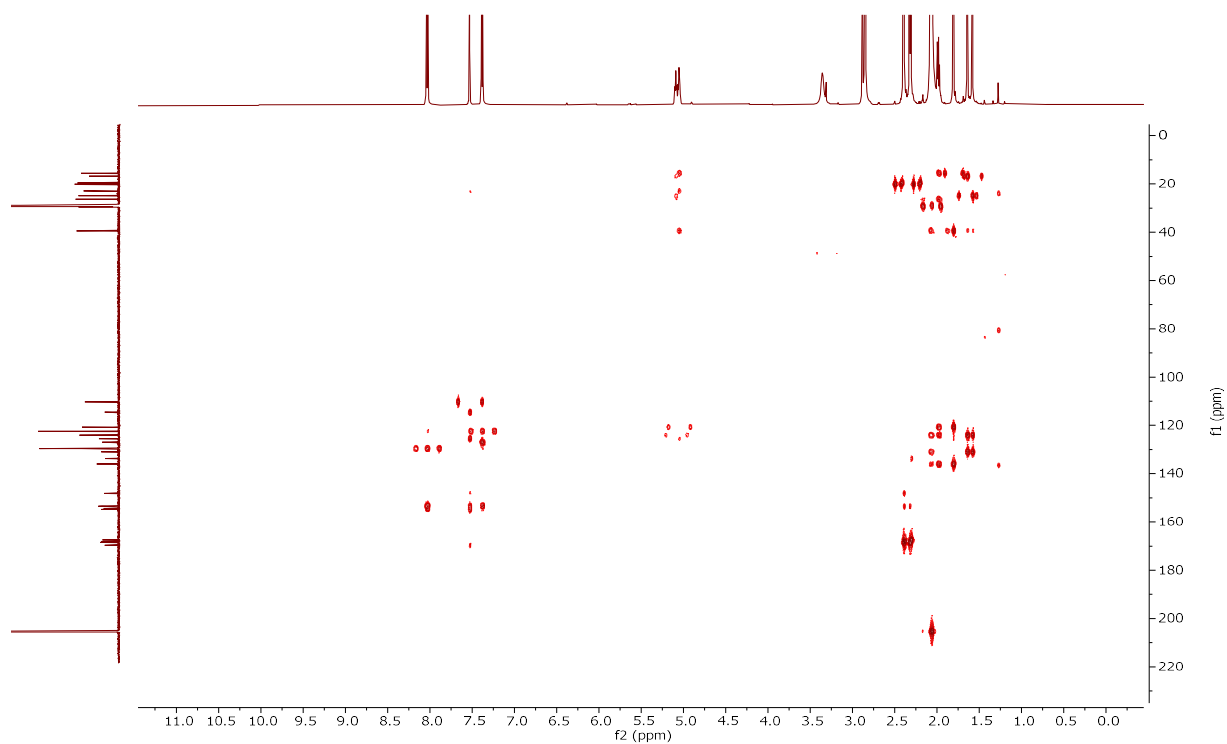

Figure S22: HMBC spectrum of **6c**

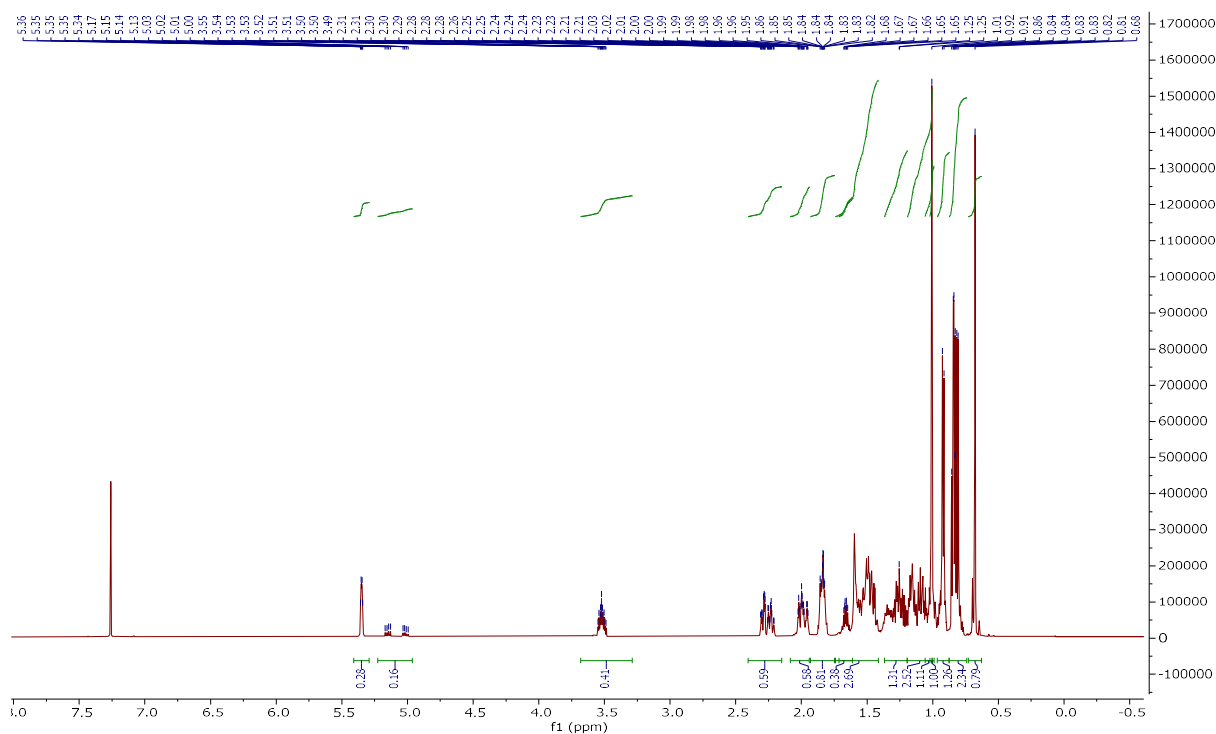

Figure S23:  $^1\text{H}$ -NMR (500 MHz,  $\text{CDCl}_3$ ) spectrum of **1+2**

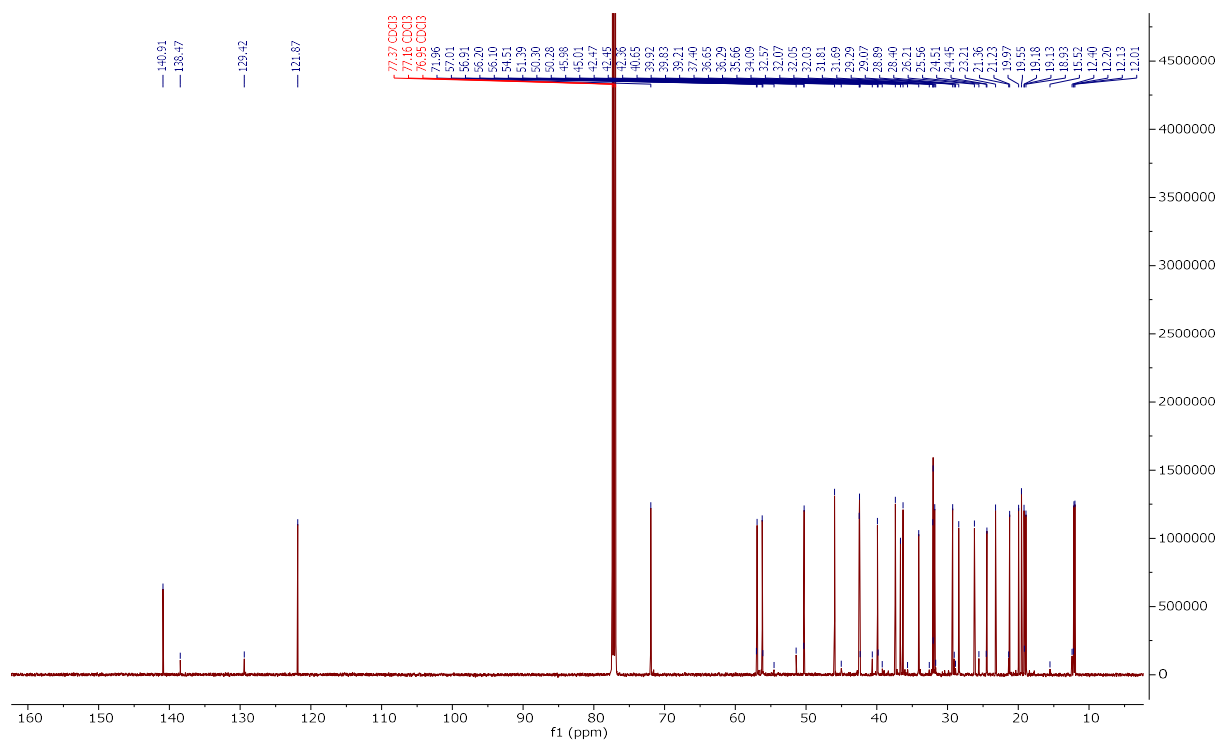

Figure S24:  $^{13}\text{C}$ -NMR (125 MHz,  $\text{CDCl}_3$ ) spectrum of **1+2**

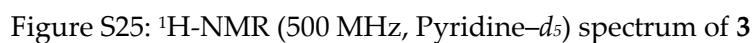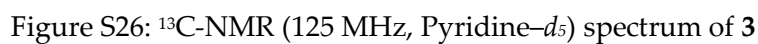



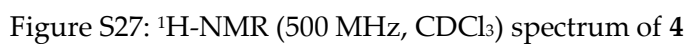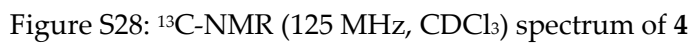

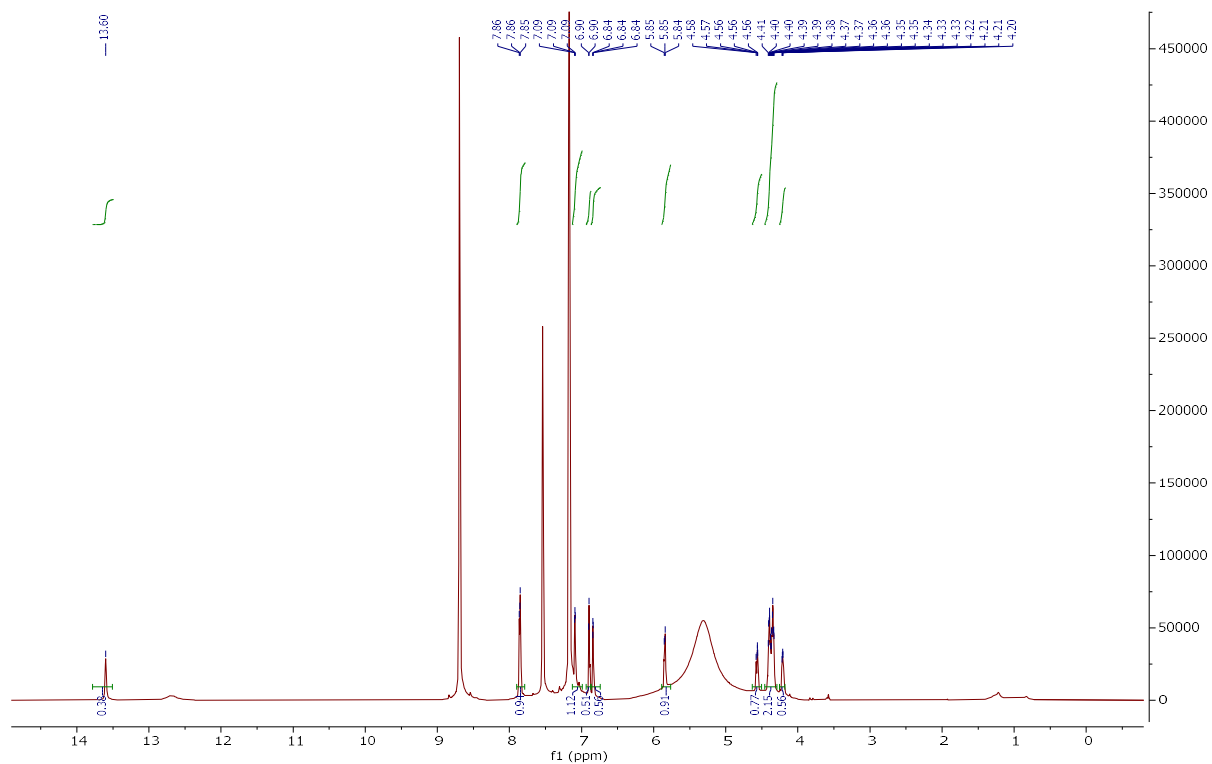

Figure S29: <sup>1</sup>H-NMR (500 MHz, acetone-*d*<sub>6</sub>) spectrum of **5**

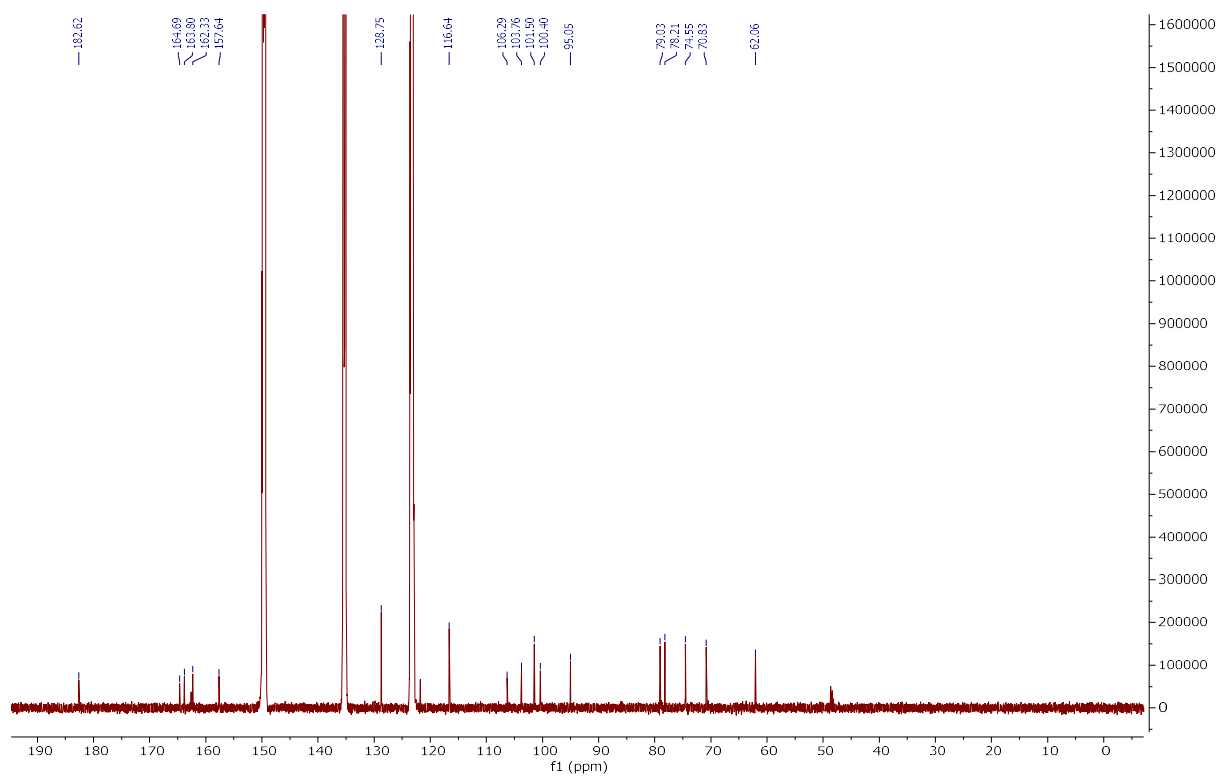

Figure S30: <sup>13</sup>C-NMR (125 MHz, acetone-*d*<sub>6</sub>) spectrum of **5**

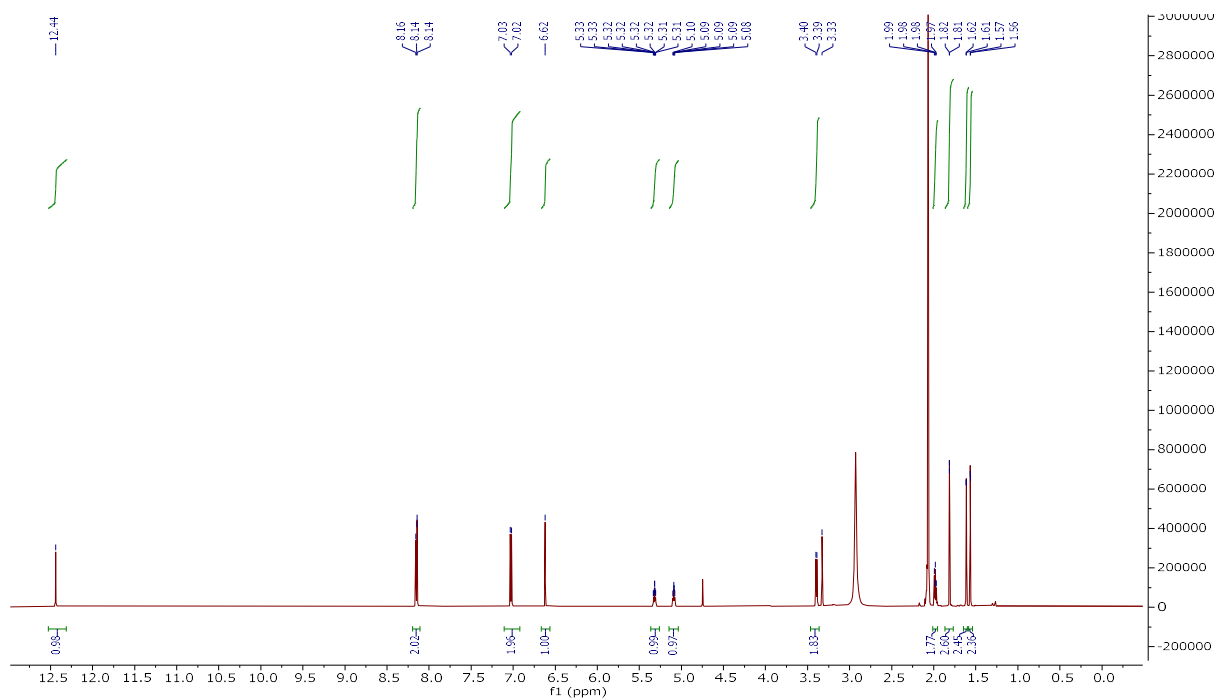

Figure S31: <sup>1</sup>H-NMR (500 MHz, acetone-*d*<sub>6</sub>) spectrum of **6**

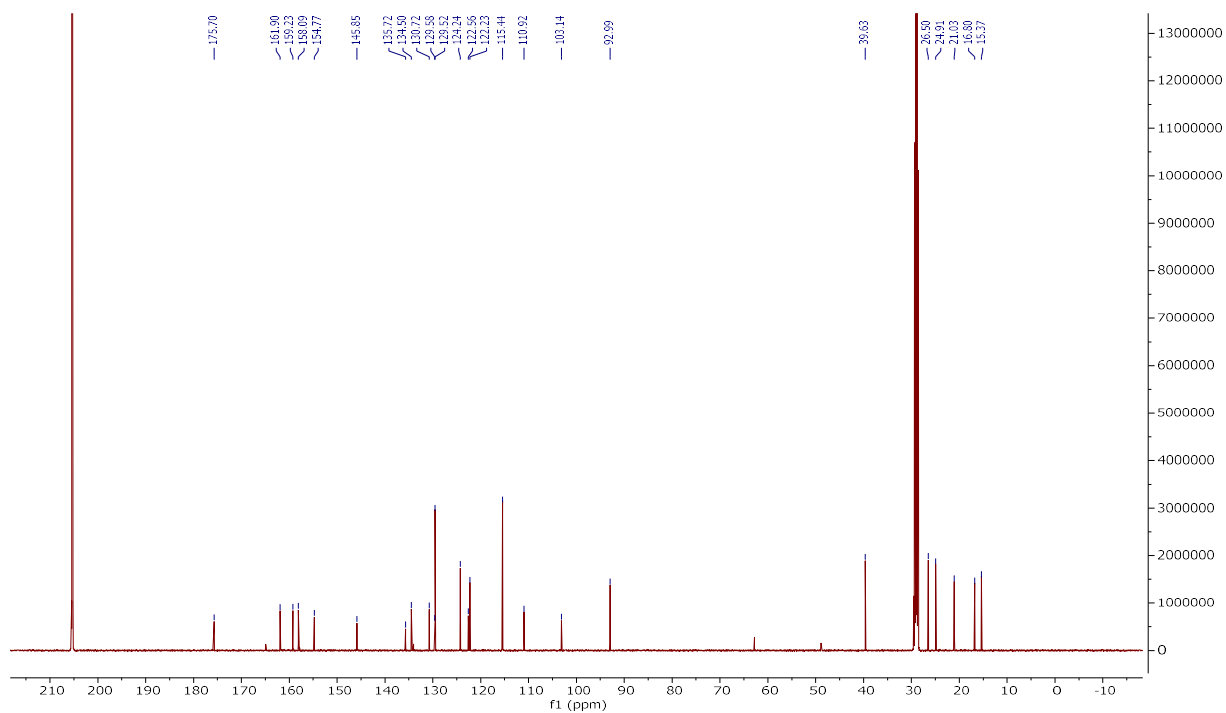

Figure S32: <sup>13</sup>C-NMR (1254 MHz, acetone-*d*<sub>6</sub>) spectrum of **6**

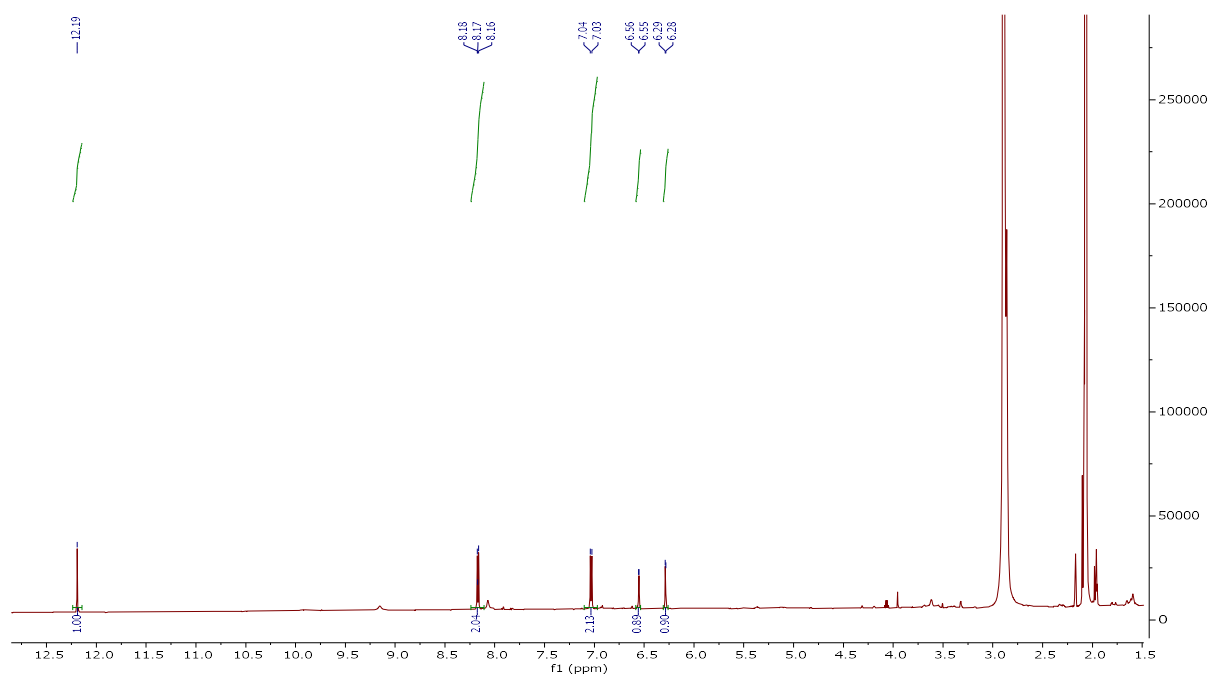

Figure S33: <sup>1</sup>H-NMR (500 MHz, acetone-*d*<sub>6</sub>) spectrum of 7

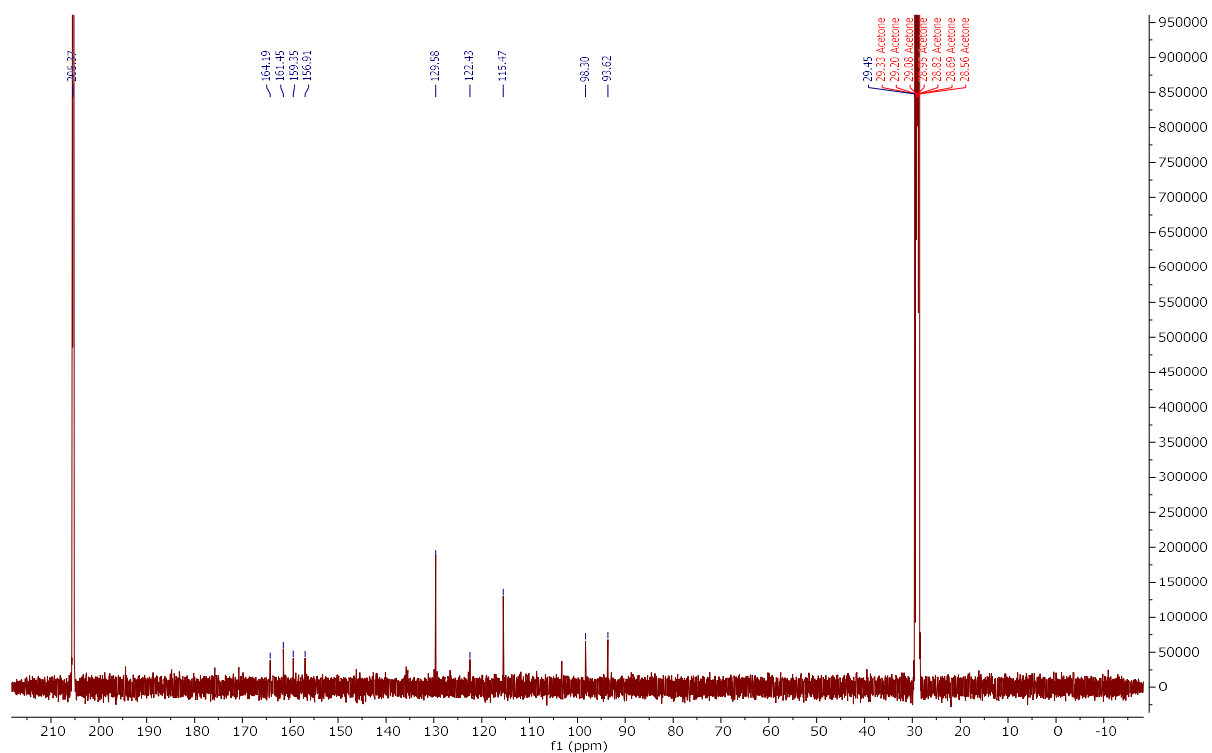

Figure S34: <sup>13</sup>C-NMR (1254 MHz, acetone-*d*<sub>6</sub>) spectrum of 7

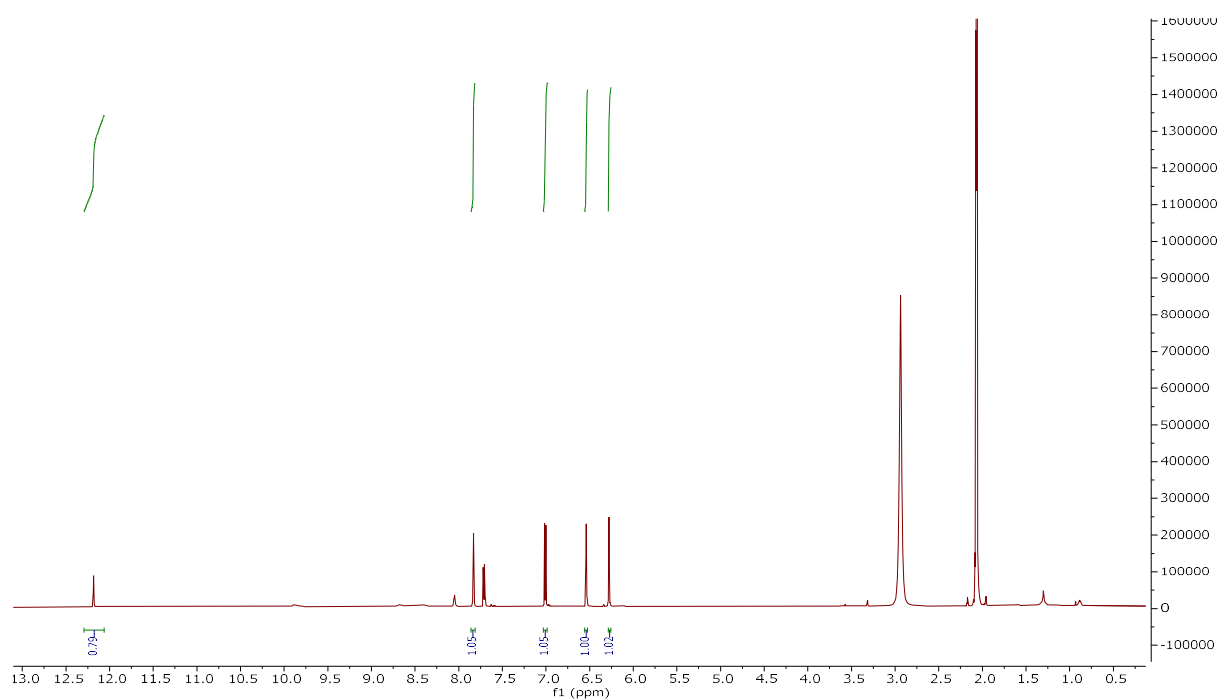

Figure S35: <sup>1</sup>H-NMR (500 MHz, acetone-*d*<sub>6</sub>) spectrum of **8**

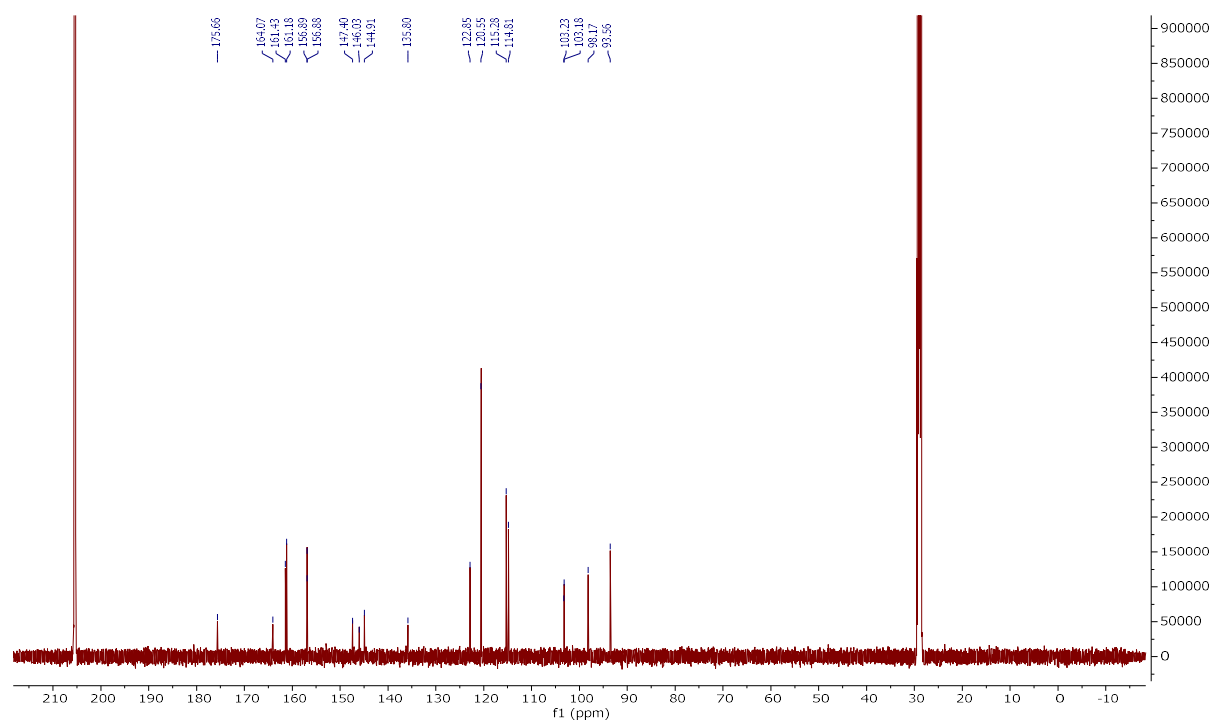

Figure S36: <sup>13</sup>C-NMR (1254 MHz, acetone-*d*<sub>6</sub>) spectrum of **8**

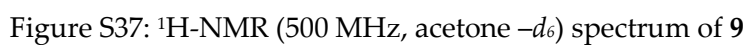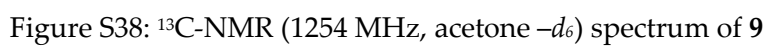

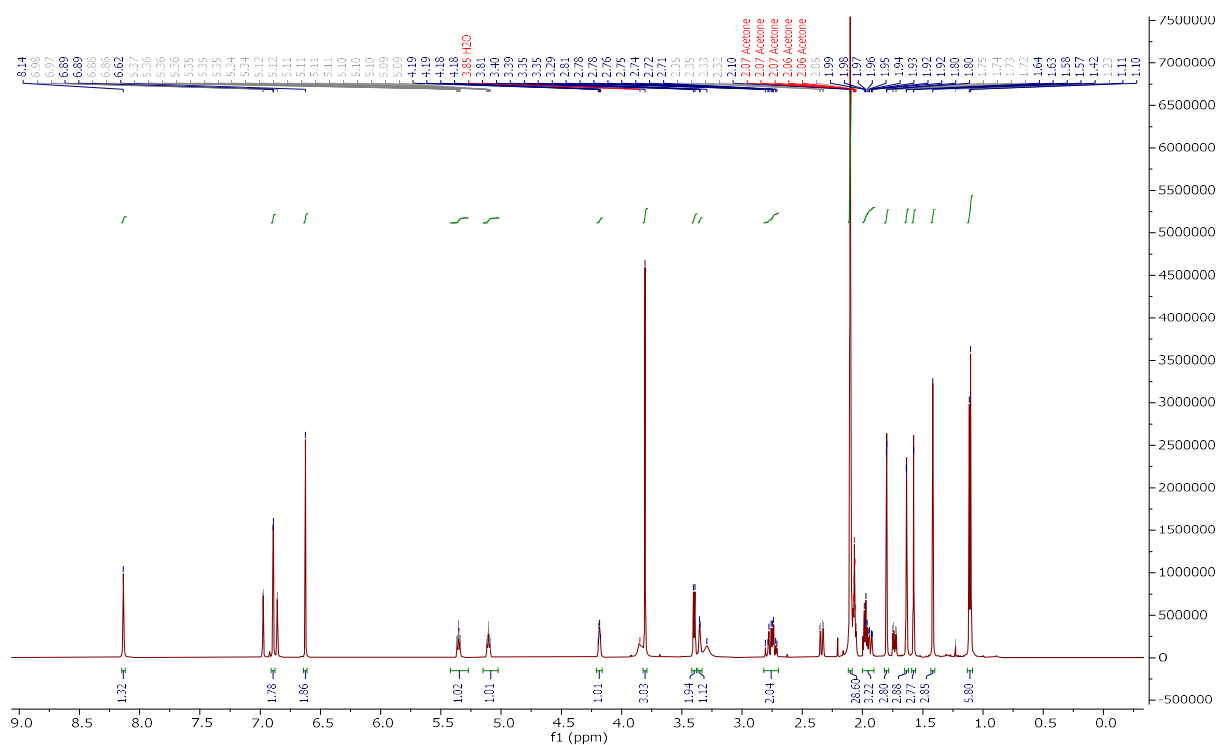

Figure S39:  $^1\text{H}$ -NMR (500 MHz, acetone- $d_6$ ) spectrum of **10**

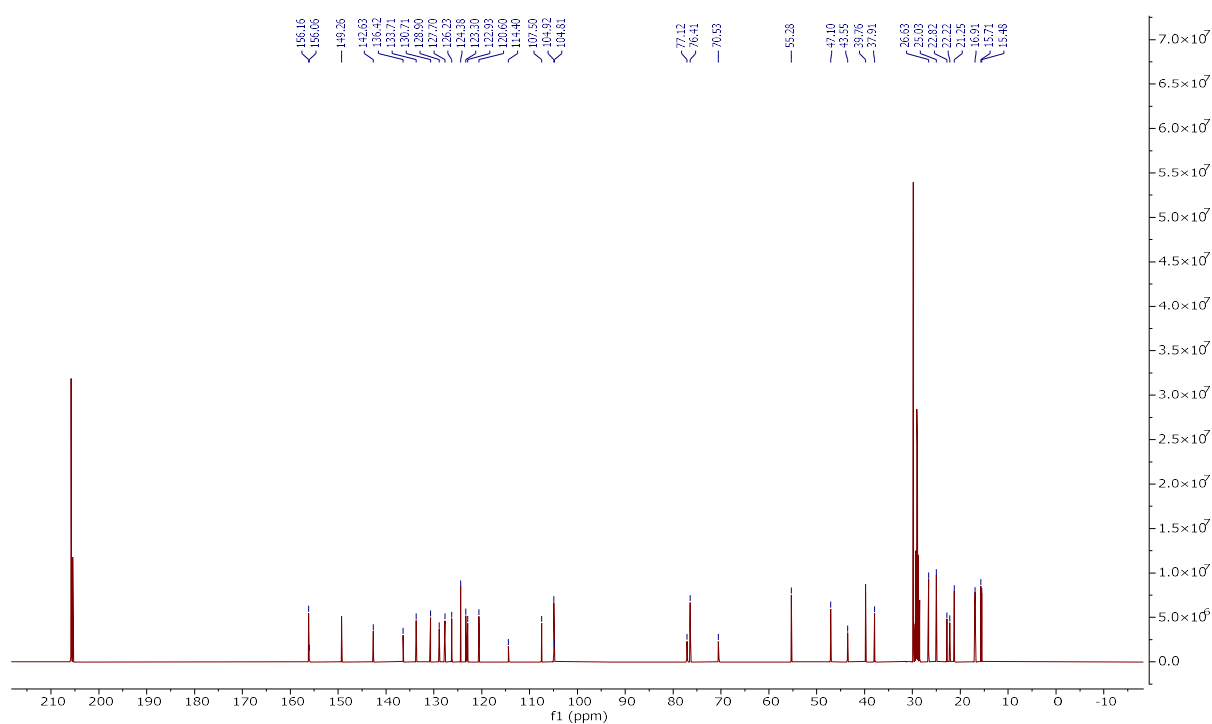

Figure S40:  $^{13}\text{C}$ -NMR (1254 MHz, acetone- $d_6$ ) spectrum of **10**

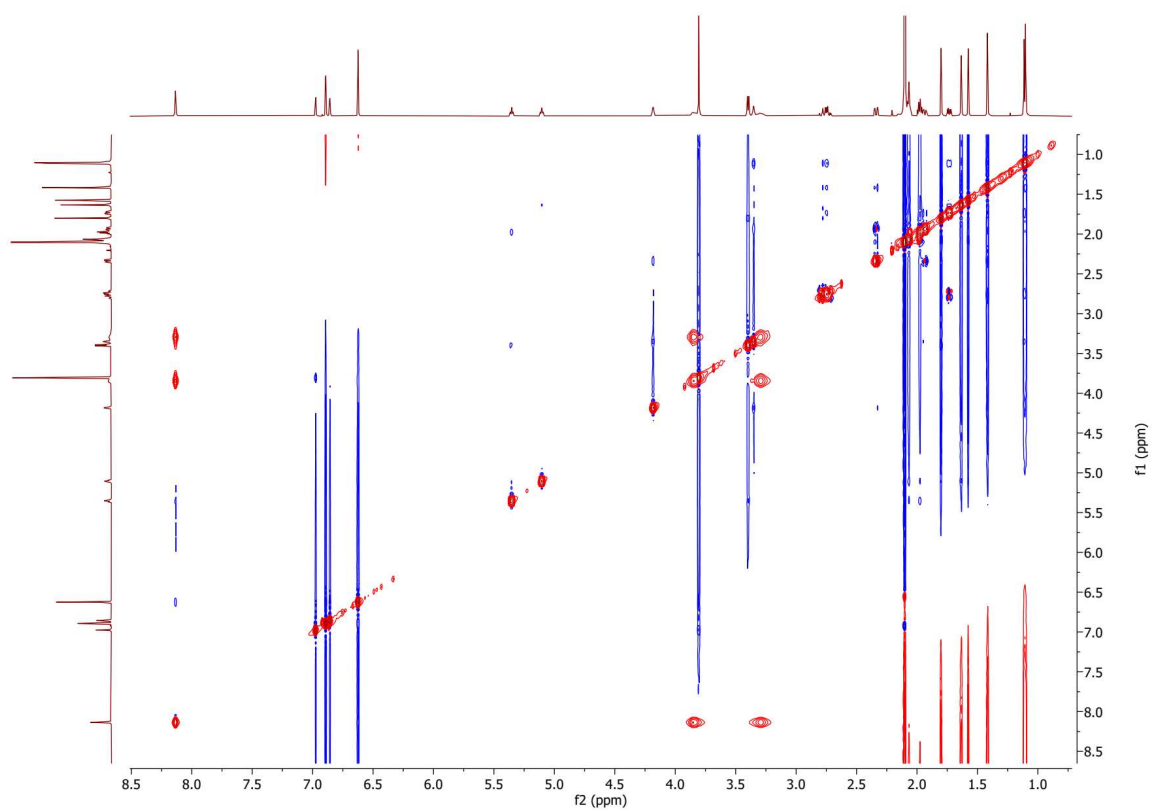

Figure S41: NOESY spectrum of **10**

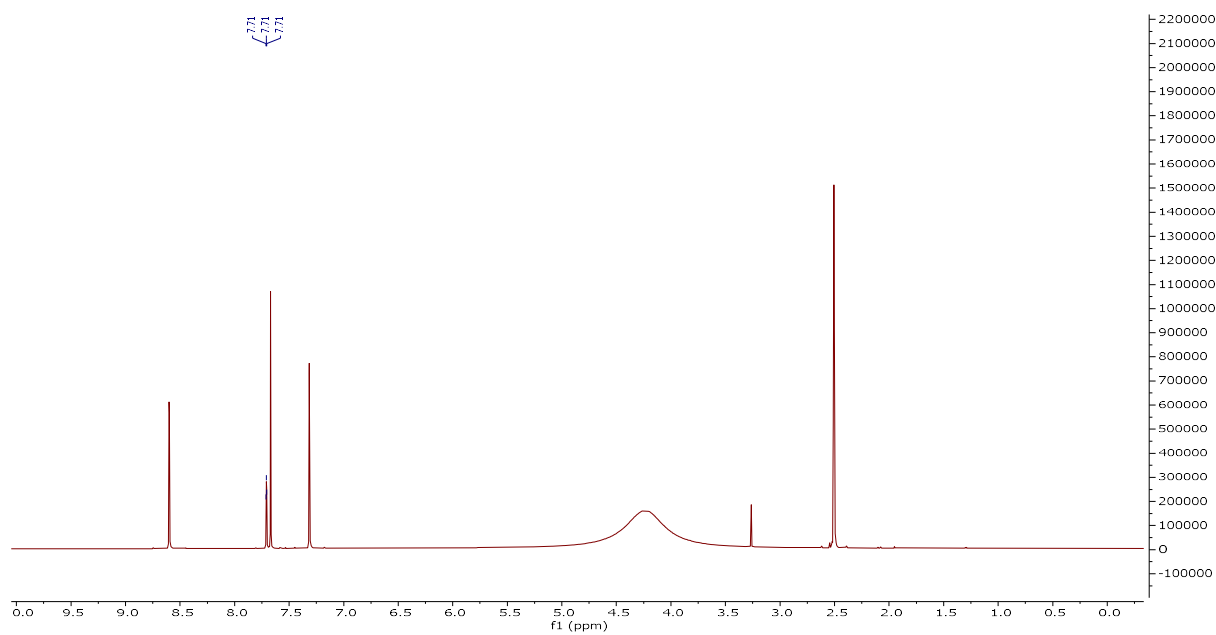

Figure S42: <sup>1</sup>H-NMR (500 MHz, Pyridine-*d*<sub>5</sub>) spectrum of **11**



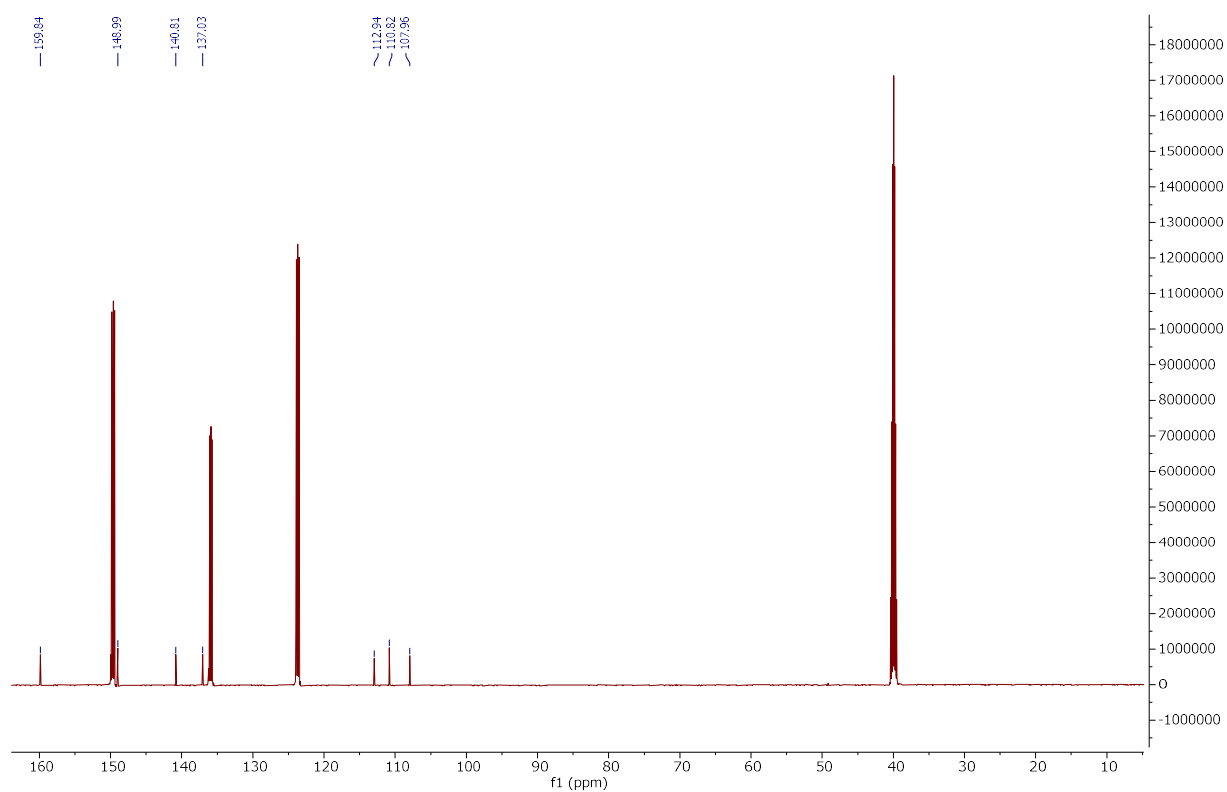

Figure S43:  $^{13}\text{C}$ -NMR (125 MHz,  $\text{Pyridine-}d_5$ ) spectrum of **11**

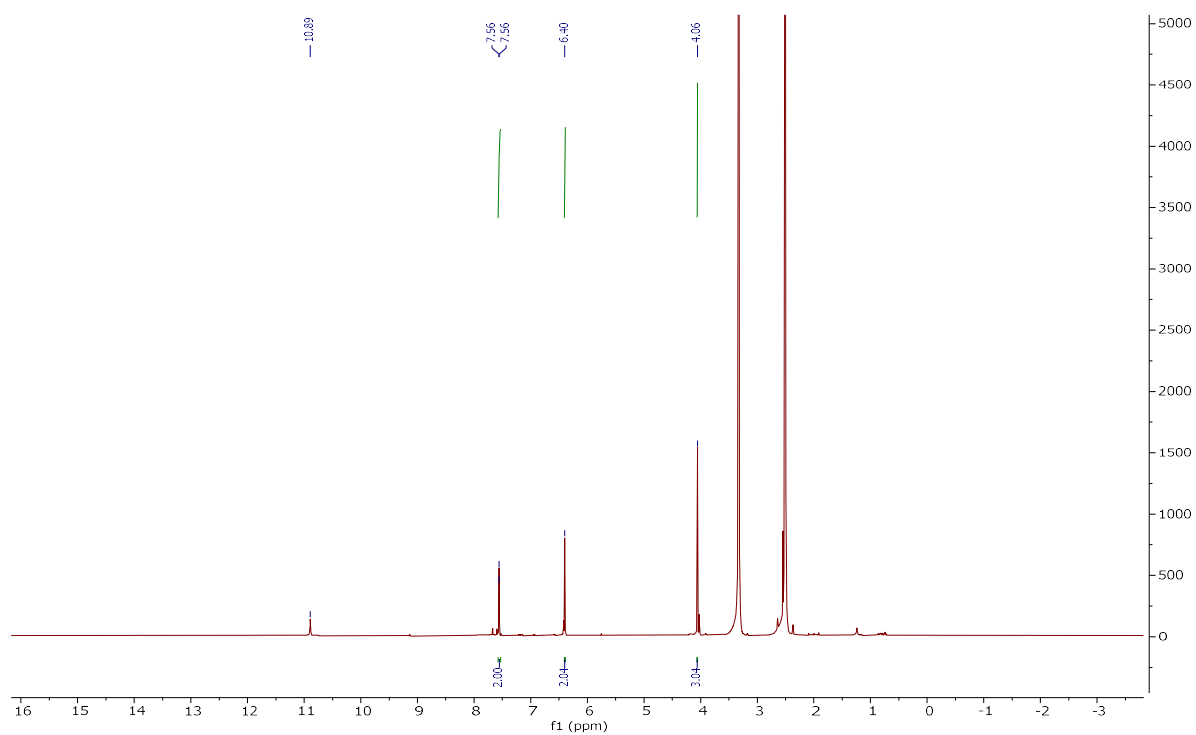

Figure S44:  $^1\text{H}$ -NMR (500 MHz,  $\text{DMSO-}d_6$ ) spectrum of **12**

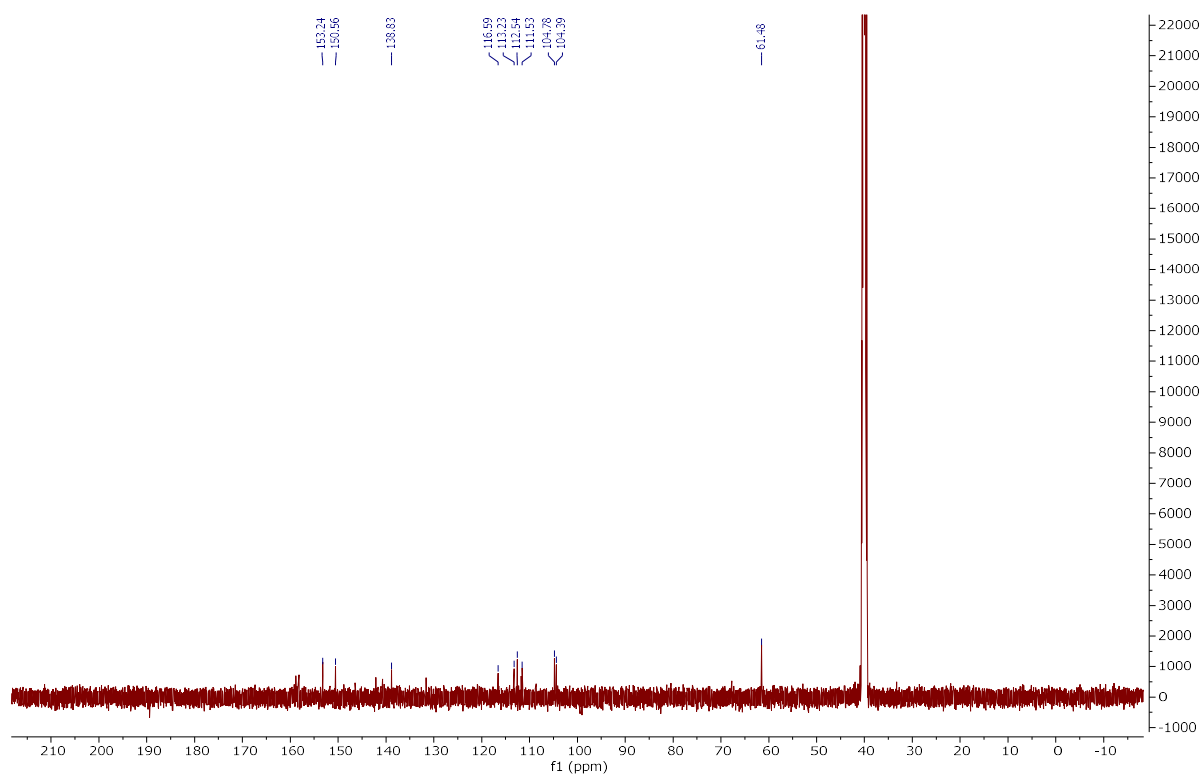

Figure S45:  $^{13}\text{C}$ -NMR (125 MHz,  $\text{DMSO}-d_6$ ) spectrum of **12**

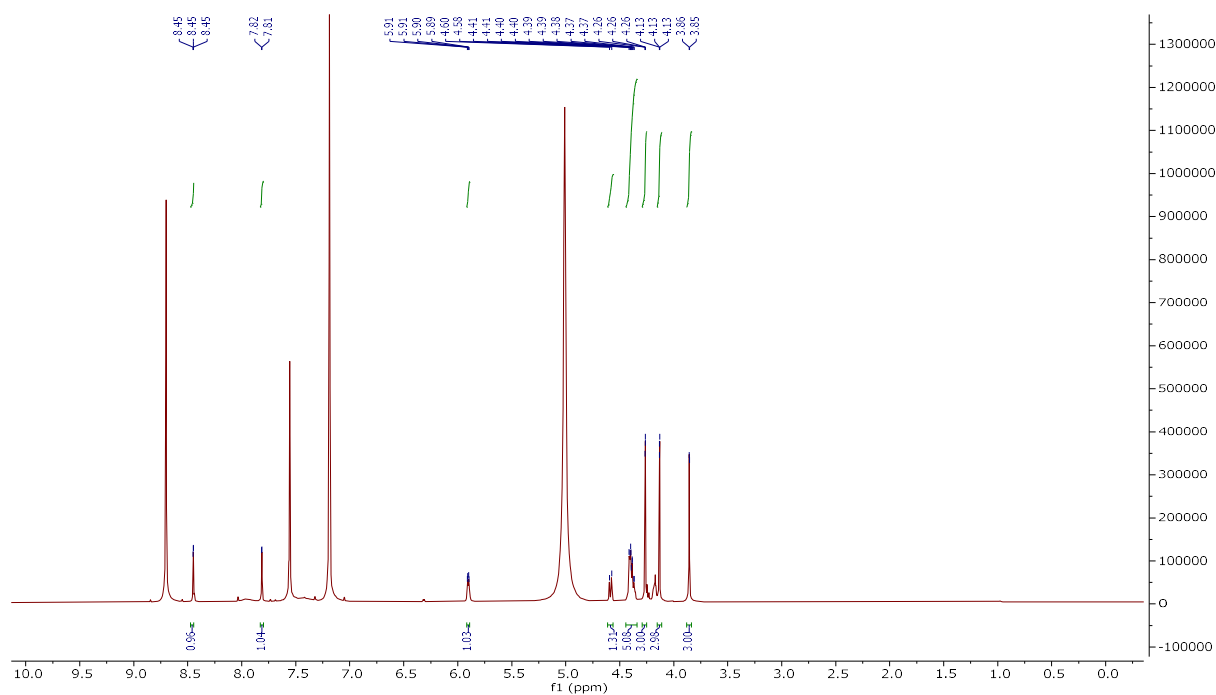

Figure S46:  $^1\text{H}$ -NMR (500 MHz,  $\text{Pyridine}-d_5$ ) spectrum of **13**

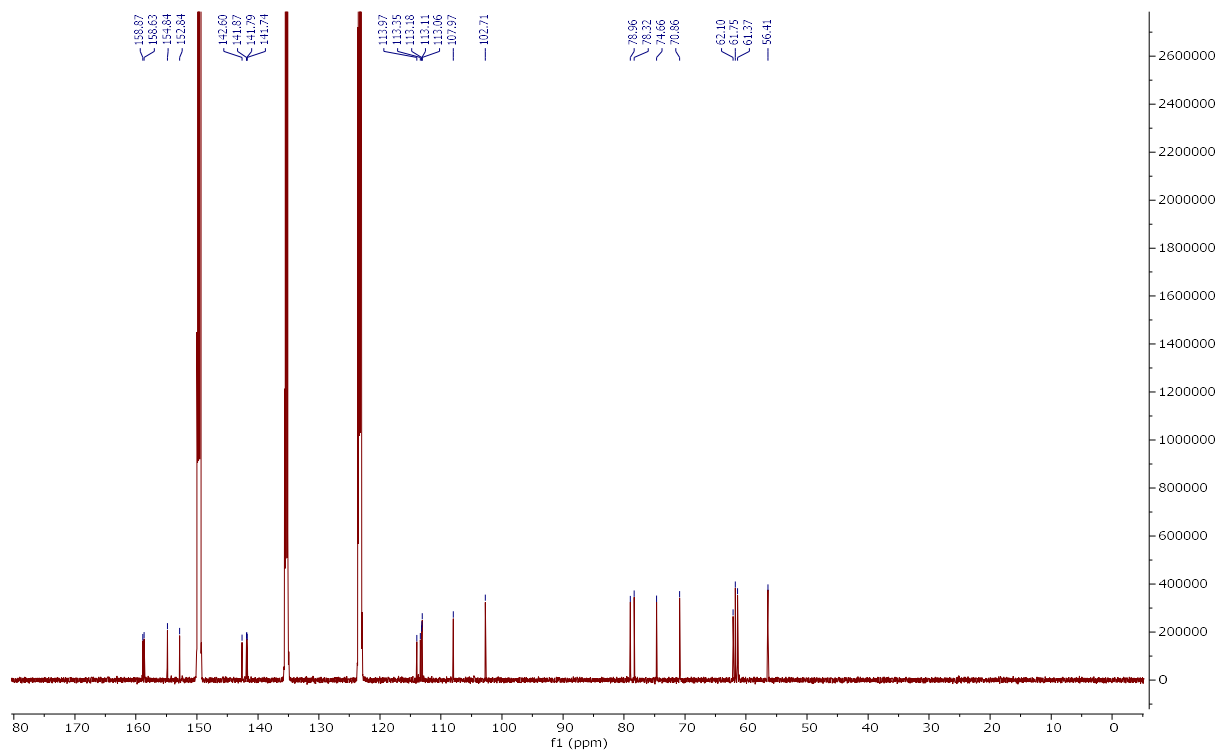

Figure S47: <sup>13</sup>C-NMR (125 MHz, Pyridine-*d*<sub>5</sub>) spectrum of **13**

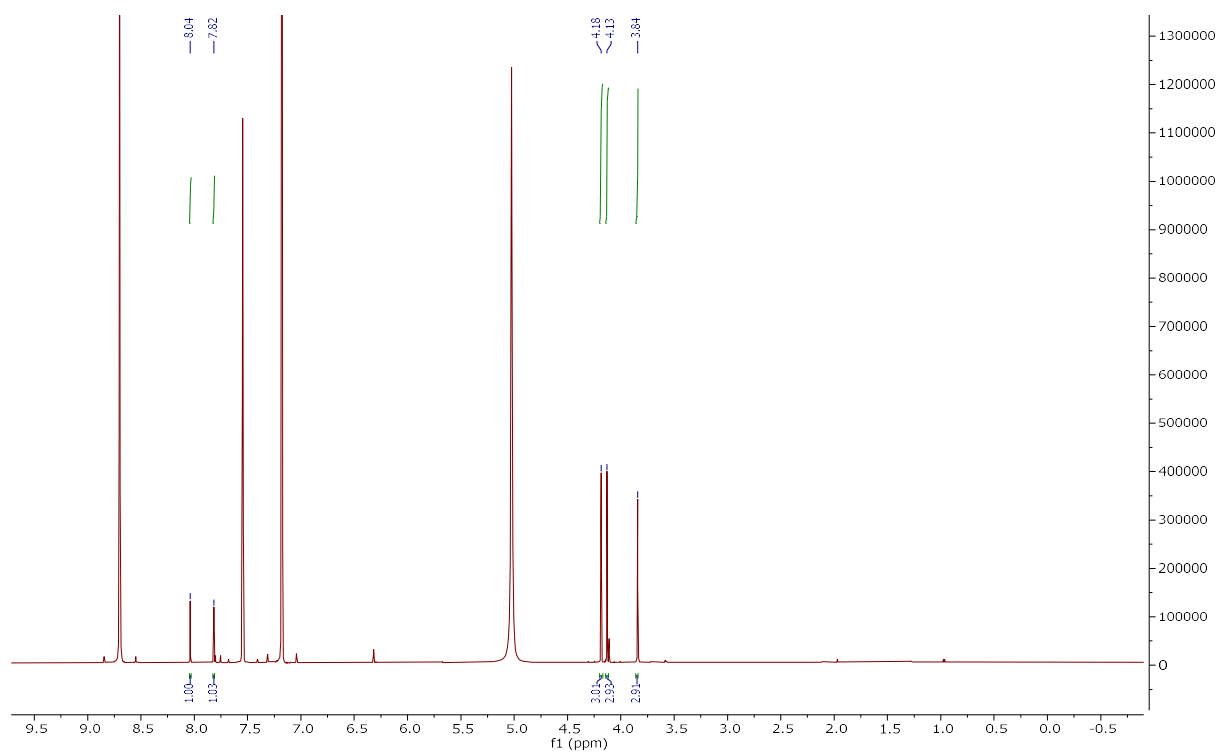

Figure S48: <sup>1</sup>H-NMR (500 MHz, Pyridine-*d*<sub>5</sub>) spectrum of **14**

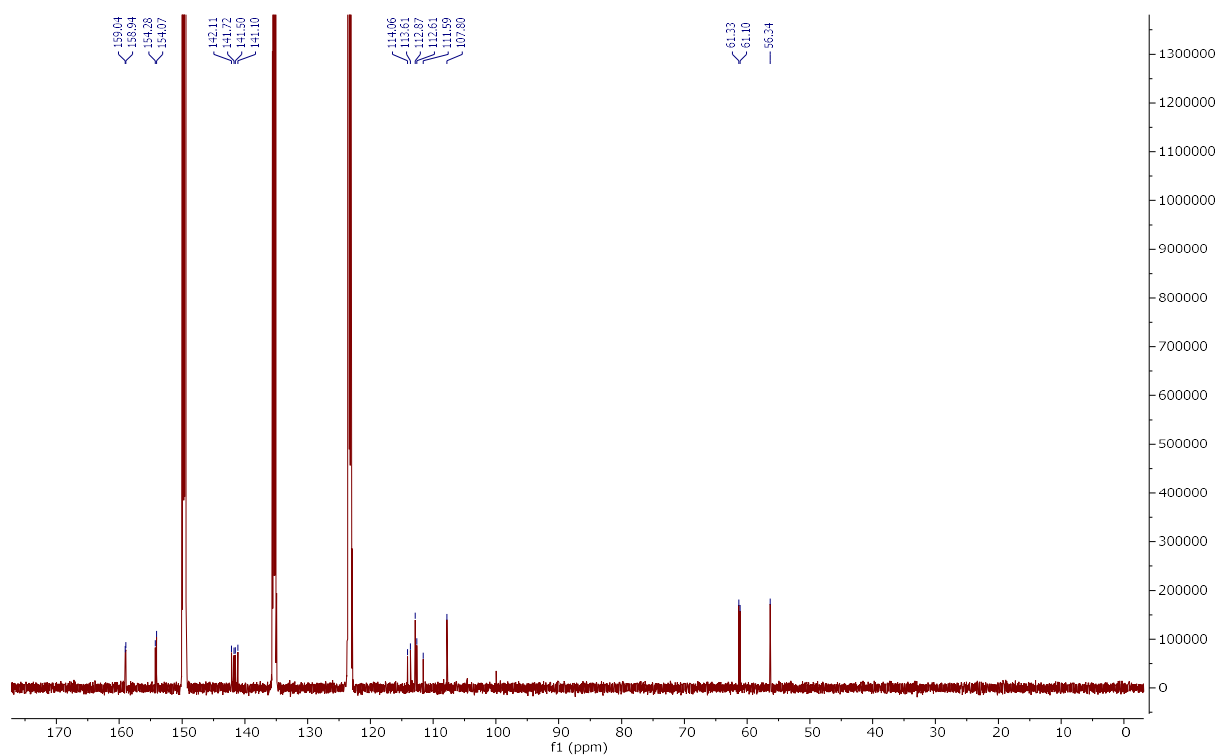

Figure S49:  $^{13}\text{C}$ -NMR (125 MHz, Pyridine- $d_5$ ) spectrum of **14**

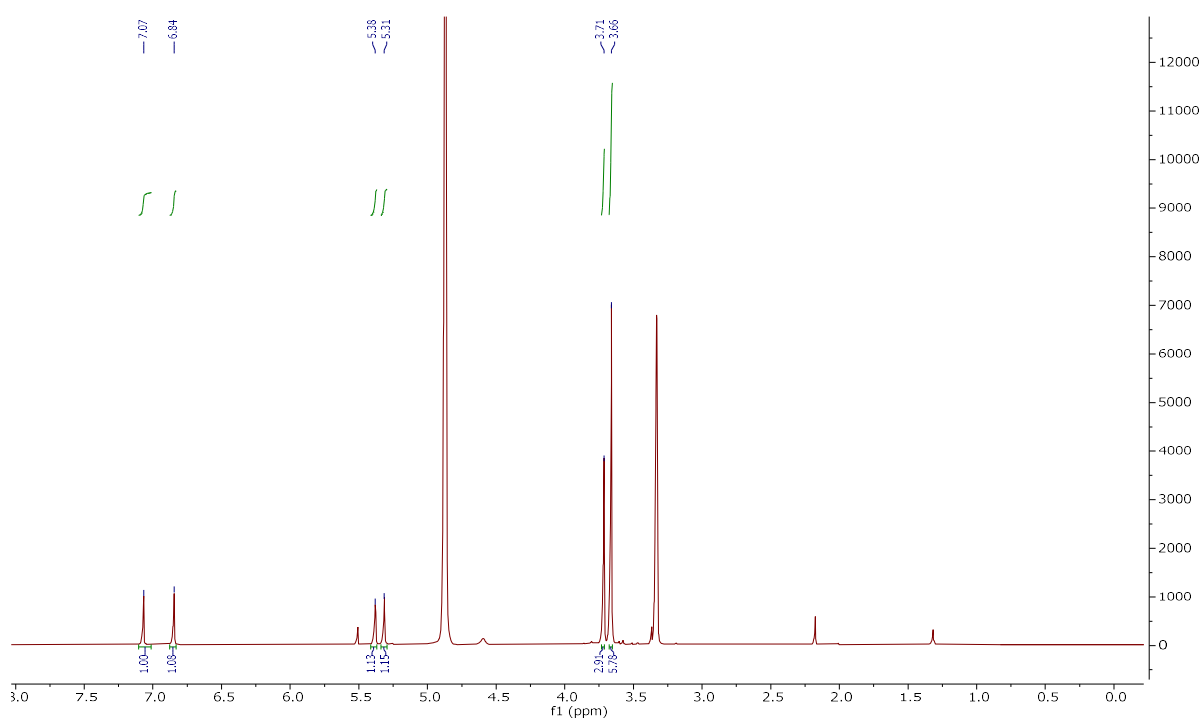

Figure S50:  $^1\text{H}$ -NMR (500 MHz,  $\text{CD}_3\text{OD}$ ) spectrum of **15**

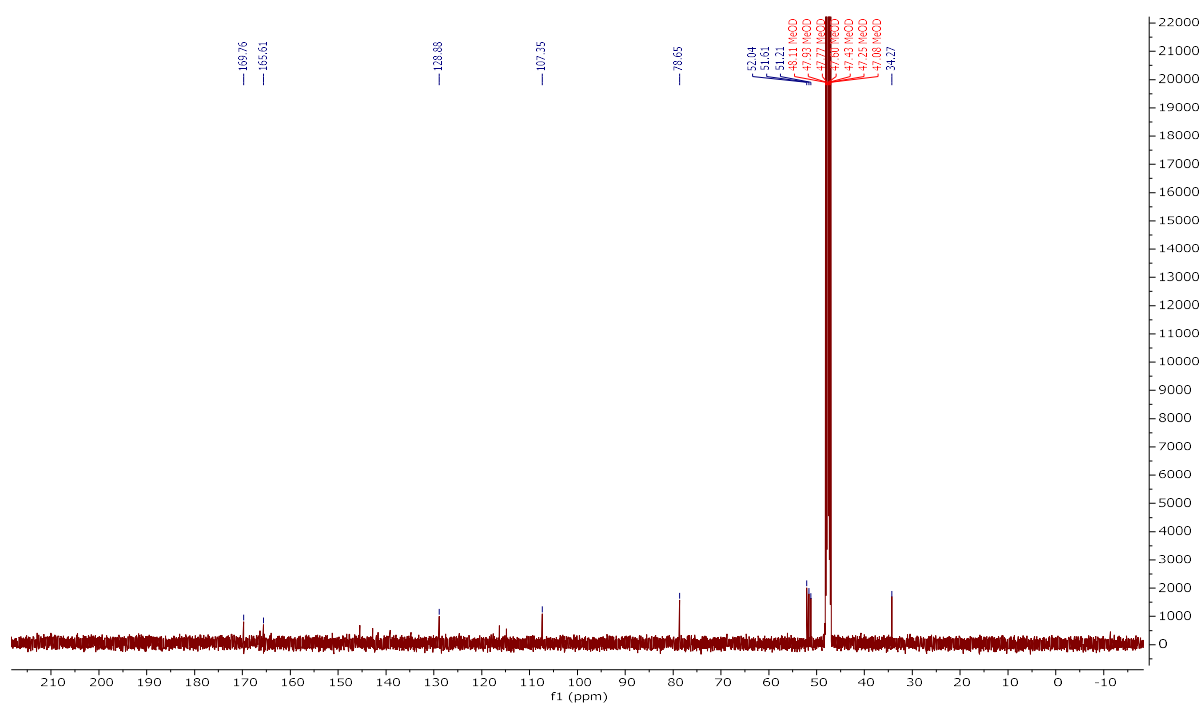

Figure S51: <sup>13</sup>C-NMR (125 MHz, CD<sub>3</sub>OD) spectrum of **15**

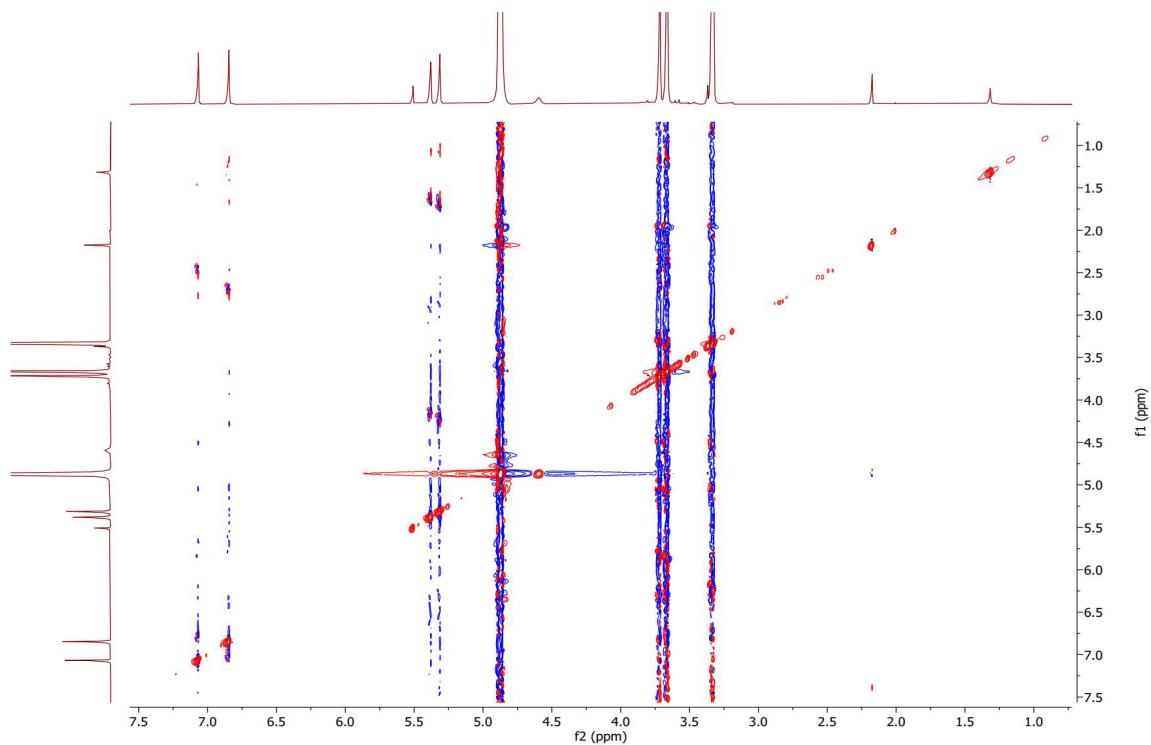

Figure S52: NOESY spectrum of **15**

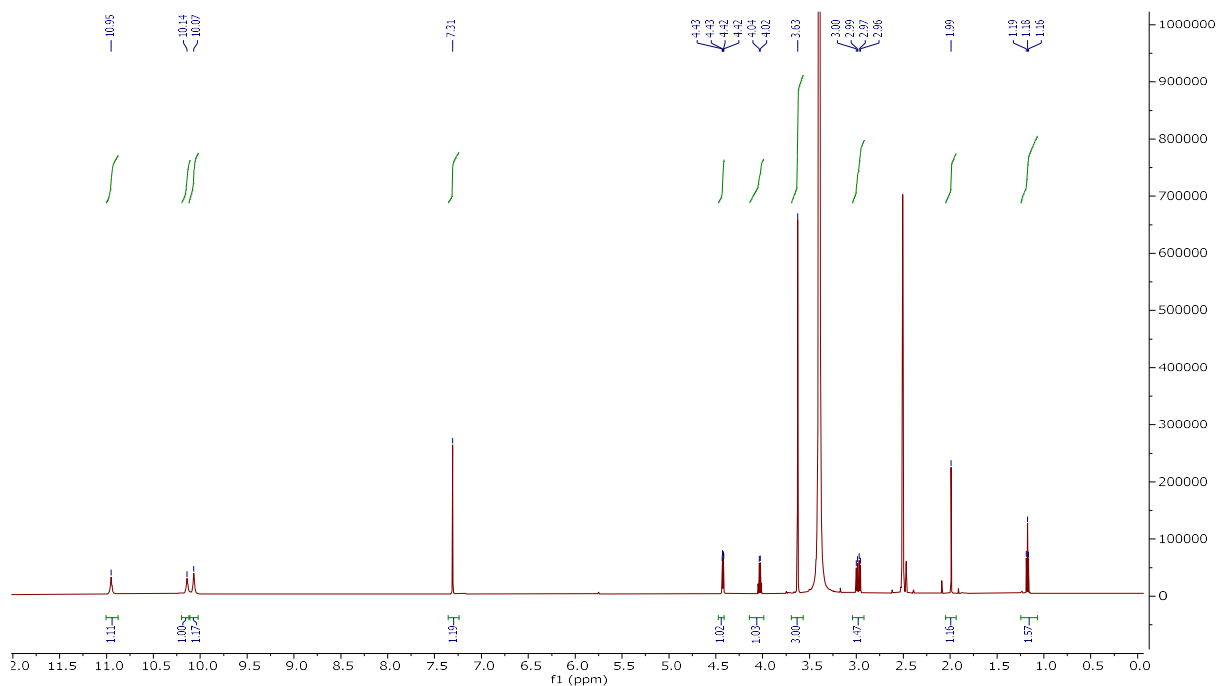

Figure S53: <sup>1</sup>H-NMR (500 MHz, DMSO-*d*<sub>6</sub>) spectrum of **16**

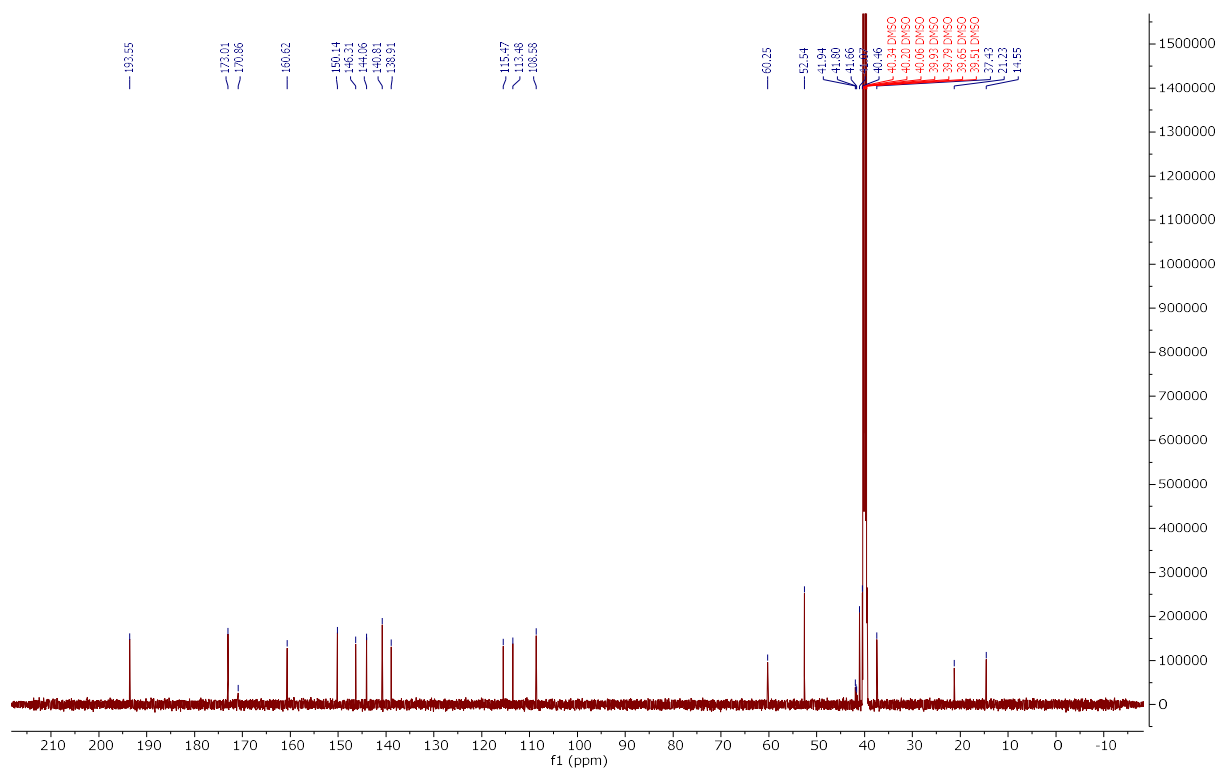

Figure S54: <sup>13</sup>C-NMR (125 MHz, DMSO-*d*<sub>6</sub>) spectrum of **16**

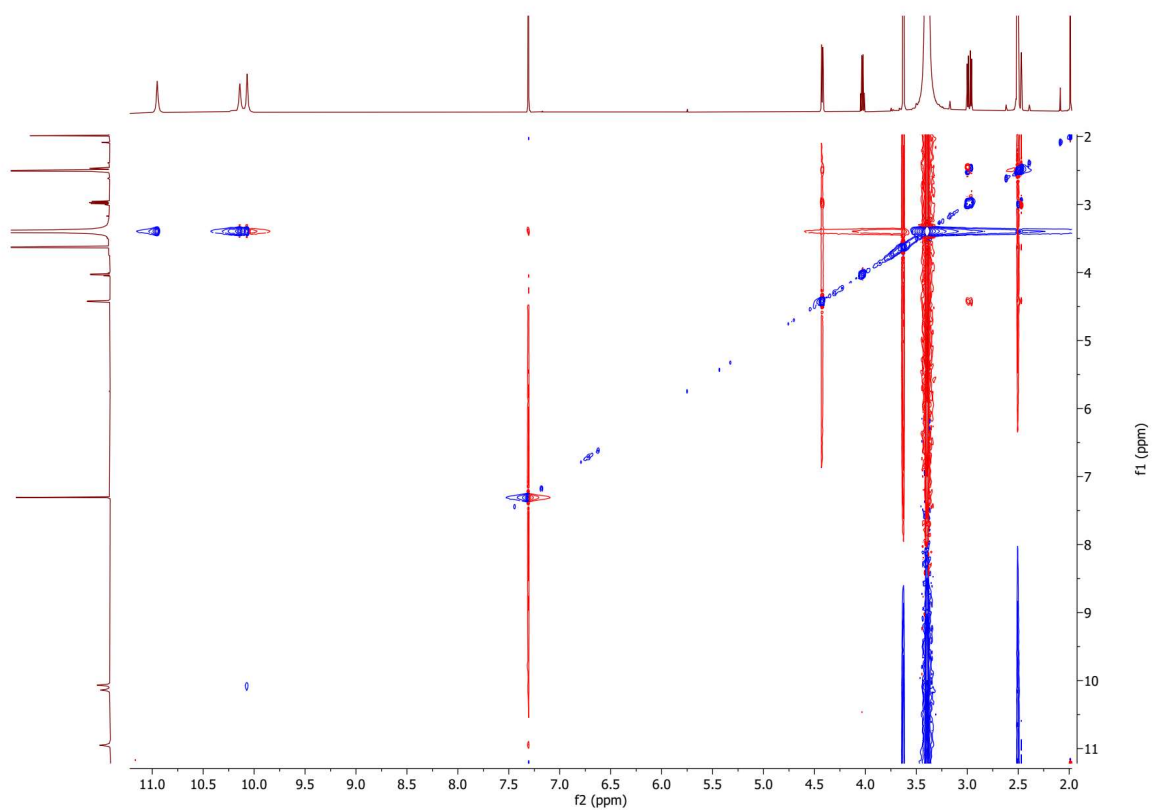

Figure S55: NOESY spectrum of **16**

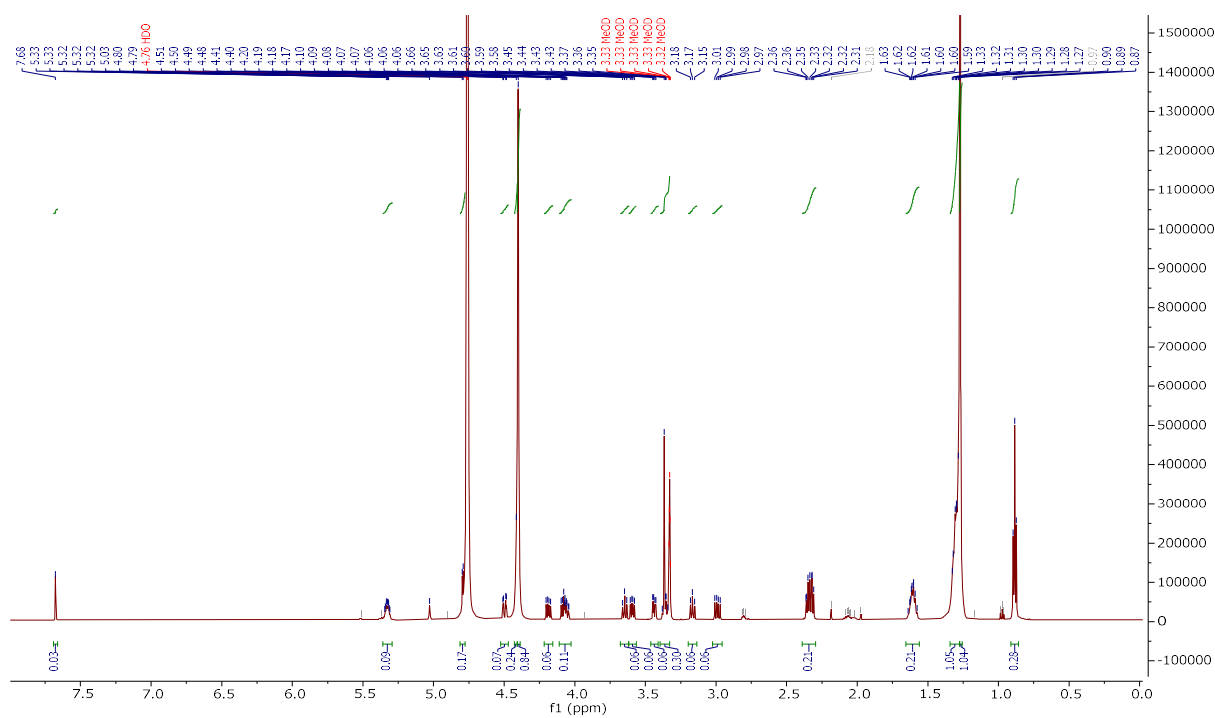

Figure S56:  $^1\text{H}$ -NMR (500 MHz,  $\text{CDCl}_3$ - $\text{CD}_3\text{OD}$ ) spectrum of **17**

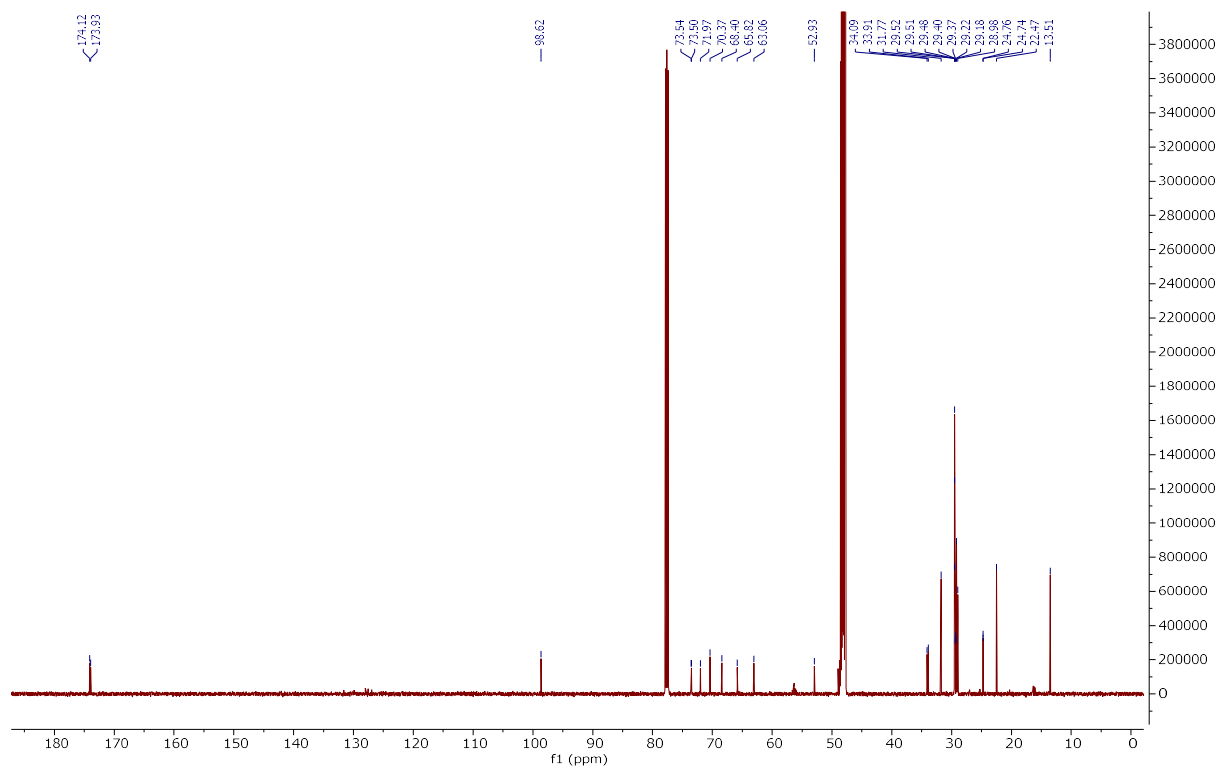

Figure S57: <sup>13</sup>C-NMR (125 MHz, CDCl<sub>3</sub>-CD<sub>3</sub>OD) spectrum of 17



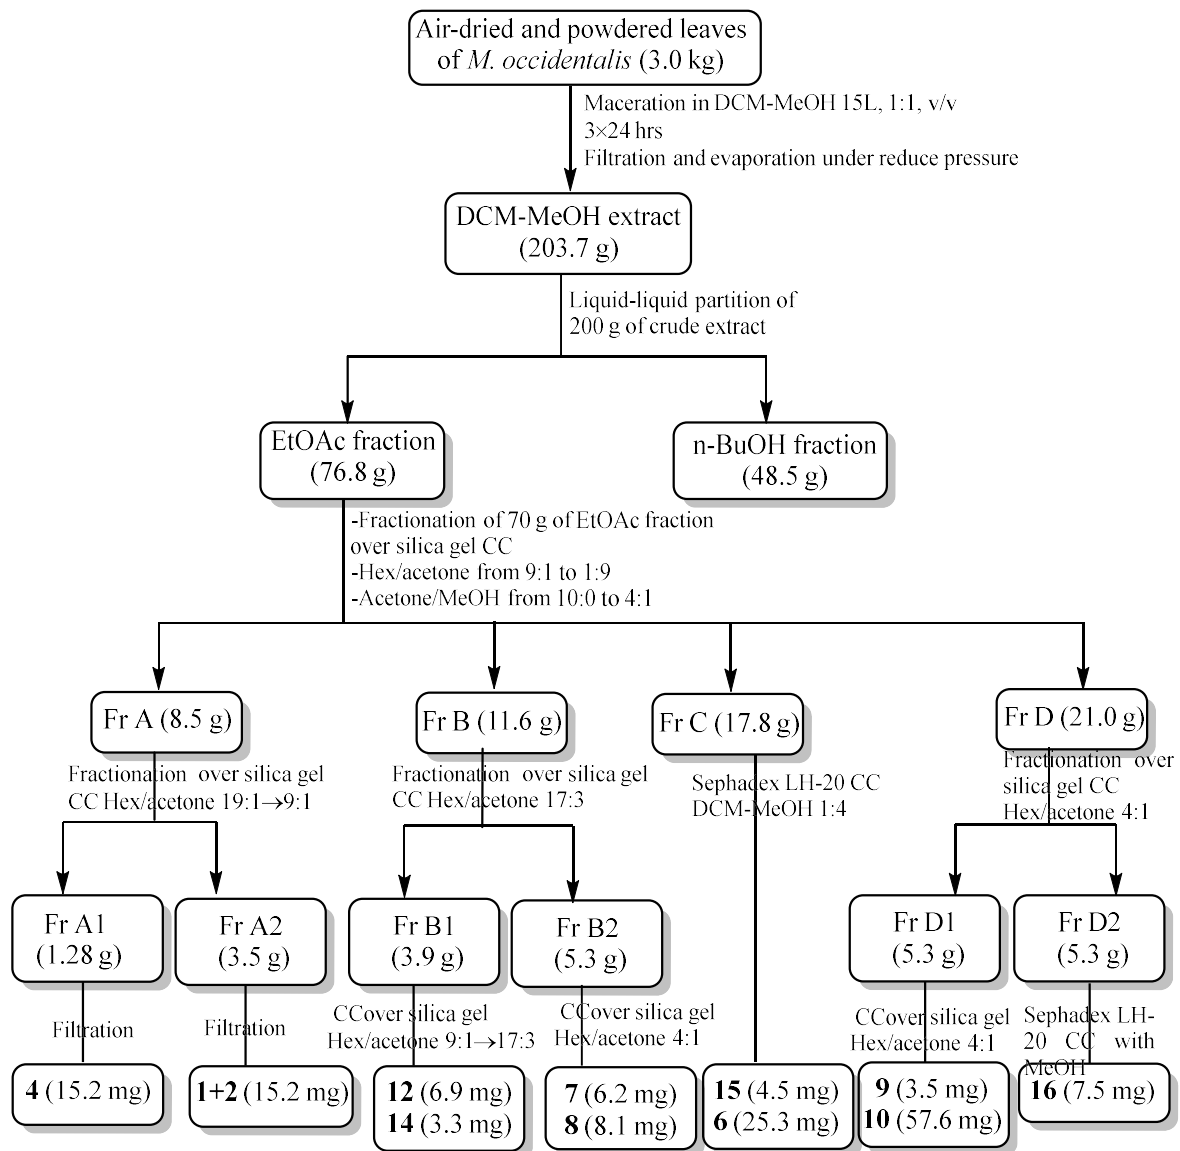

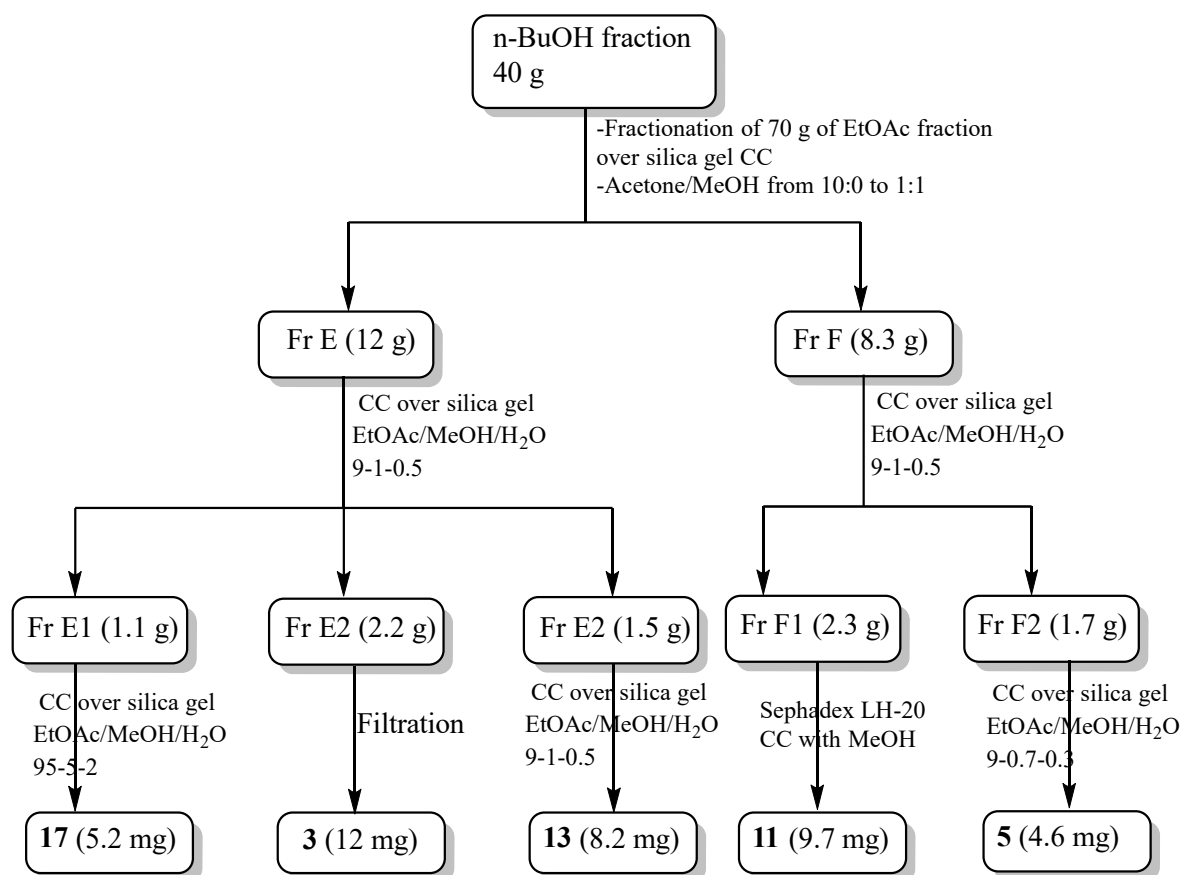

Scheme S1. Protocol of extraction and isolation of compounds from *M. occidentalis*
